# Supplementary material for: Isolation and Structure Elucidation of Novel Mycosporine-like Amino Acids from the Two Intertidal Red Macroalgae Bostrychia scorpioides and Catenella caespitosa
Source: MDPI journal article supplement (doi:10.3390/md21100543), 2023-10-18
Supplement: s1 [file s1]

## Supplementary Materials

# Isolation and Structure Elucidation of Novel Mycosporine-like Amino Acids from the Two Intertidal Red Macroalgae *Bostrychia scorpioides* and *Catenella caespitosa*

Maria Orfanoudaki <sup>1</sup>, Mostafa Alilou <sup>1</sup>, Anja Hartmann <sup>1</sup>, Julia Mayr <sup>1</sup>, Ulf Karsten <sup>2</sup>,  
Hieu Nguyen-Ngoc <sup>1,3,4</sup> and Markus Ganzera <sup>1,\*</sup>

<sup>1</sup> Institute of Pharmacy, Pharmacognosy, University of Innsbruck, Innrain 80-82,  
6020 Innsbruck, Austria; orfmaria@gmail.com (M.O.); mostafa.alilou@uibk.ac.at (M.A.);  
anja-k-hartmann@web.de (A.H.); julia\_mayr1@gmx.at (J.M.);  
hieu.nguyenngoc@phenikaa-uni.edu.vn (H.N.-N.)

<sup>2</sup> Institute of Biological Sciences, Applied Ecology & Phycology,  
University of Rostock, Albert-Einstein-Str. 3, 18059 Rostock, Germany;  
ulf.karsten@uni-rostock.de

<sup>3</sup> Faculty of Pharmacy, Phenikaa University, Hanoi 12116, Vietnam

<sup>4</sup> A&A Green Phoenix Group JSC, Phenikaa Research and Technology Institute (PRATI),  
No.167 Hoang Ngan, Trung Hoa, Cau Giay, Hanoi 11313, Vietnam

\* Correspondence: markus.ganzera@uibk.ac.at; Tel.: +43-512-507-58406

## Contents

|                                                                                                                                                                     |    |
|---------------------------------------------------------------------------------------------------------------------------------------------------------------------|----|
| Figure S1. $^1\text{H}$ NMR spectrum of compound 1 in $\text{D}_2\text{O}$ .....                                                                                    | 4  |
| Figure S2. COSY spectrum of compound 1 in $\text{D}_2\text{O}$ .....                                                                                                | 4  |
| Figure S3. HSQC spectrum of compound 1 in $\text{D}_2\text{O}$ .....                                                                                                | 5  |
| Figure S4. HMBC spectrum of compound 1 in $\text{D}_2\text{O}$ .....                                                                                                | 5  |
| Figure S5. $^{13}\text{C}$ NMR spectrum of compound 1 in $\text{D}_2\text{O}$ .....                                                                                 | 6  |
| Figure S6. High-resolution mass spectrum of compound 1 .....                                                                                                        | 6  |
| Figure S7. Overlayed conformers and population of Boltzmann averaged conformers of compound 1 optimized at the DFT/wb97xd/6-31+g(d,p) level in the gas phase. ....  | 6  |
| Figure S8. $^1\text{H}$ NMR spectrum of compound 2 in $\text{D}_2\text{O}$ .....                                                                                    | 7  |
| Figure S9. COSY spectrum of compound 2 in $\text{D}_2\text{O}$ .....                                                                                                | 7  |
| Figure S10. HSQC spectrum of compound 2 in $\text{D}_2\text{O}$ .....                                                                                               | 8  |
| Figure S11. HMBC spectrum of compound 2 in $\text{D}_2\text{O}$ .....                                                                                               | 8  |
| Figure S12. $^{13}\text{C}$ NMR spectrum of compound 2 in $\text{D}_2\text{O}$ .....                                                                                | 9  |
| Figure S13. High-resolution mass spectrum of compound 2 .....                                                                                                       | 9  |
| Figure S14. Overlayed conformers and population of Boltzmann averaged conformers of compound 2 optimized at the DFT/wb97xd/6-31+g(d,p) level in the gas phase. .... | 10 |
| Figure S15. $^1\text{H}$ NMR spectrum of compounds 3 and 4 in $\text{D}_2\text{O}$ .....                                                                            | 10 |
| Figure S16. COSY spectrum of compounds 3 and 4 in $\text{D}_2\text{O}$ .....                                                                                        | 11 |
| Figure S17. HSQC spectrum of compounds 3 and 4 in $\text{D}_2\text{O}$ .....                                                                                        | 12 |
| Figure S18. HMBC spectrum of compounds 3 and 4 in $\text{D}_2\text{O}$ .....                                                                                        | 12 |
| Figure S19. $^{13}\text{C}$ NMR spectrum of compounds 3 and 4 in $\text{D}_2\text{O}$ .....                                                                         | 13 |
| Figure S20. High-resolution mass spectrum of compounds 3 and 4.....                                                                                                 | 13 |
| Figure S21. $^1\text{H}$ NMR spectrum of compounds 5 and 6 in $\text{D}_2\text{O}$ .....                                                                            | 14 |
| Figure S22. COSY spectrum of compounds 5 and 6 in $\text{D}_2\text{O}$ .....                                                                                        | 14 |
| Figure S23. HSQC spectrum of compounds 5 and 6 in $\text{D}_2\text{O}$ .....                                                                                        | 15 |
| Figure S24. HMBC spectrum of compounds 5 and 6 in $\text{D}_2\text{O}$ .....                                                                                        | 16 |
| Figure S25. $^{13}\text{C}$ NMR spectrum of compounds 5 and 6 in $\text{D}_2\text{O}$ .....                                                                         | 16 |
| Figure S26. High-resolution mass spectrum of compounds 5 and 6.....                                                                                                 | 16 |
| Figure S27. $^1\text{H}$ NMR spectrum of compound 7 in $\text{D}_2\text{O}$ .....                                                                                   | 17 |
| Figure S28. COSY spectrum of compound 7 in $\text{D}_2\text{O}$ .....                                                                                               | 17 |
| Figure S29. HSQC spectrum of compound 7 in $\text{D}_2\text{O}$ .....                                                                                               | 18 |
| Figure S30. HMBC spectrum of compound 7 in $\text{D}_2\text{O}$ .....                                                                                               | 18 |

|                                                                                                                                                                     |    |
|---------------------------------------------------------------------------------------------------------------------------------------------------------------------|----|
| Figure S31. $^{13}\text{C}$ NMR spectrum of compound 7 in $\text{D}_2\text{O}$ .....                                                                                | 19 |
| Figure S32. High-resolution mass spectrum of compound 7 .....                                                                                                       | 19 |
| Figure S33. Overlayed conformers and population of Boltzmann averaged conformers of compound 7 optimized at the DFT/wb97xd/6-31+g(d,p) level in the gas phase. .... | 20 |
| Figure S34. $^1\text{H}$ NMR spectrum of compound 8 in $\text{D}_2\text{O}$ .....                                                                                   | 21 |
| Figure S35. COSY spectrum of compound 8 in $\text{D}_2\text{O}$ .....                                                                                               | 21 |
| Figure S36. HSQC spectrum of compound 8 in $\text{D}_2\text{O}$ .....                                                                                               | 22 |
| Figure S37. HMBC spectrum of compound 8 in $\text{D}_2\text{O}$ .....                                                                                               | 22 |
| Figure S38. $^{13}\text{C}$ NMR spectrum of compound 8 in $\text{D}_2\text{O}$ .....                                                                                | 23 |
| Figure S39. High-resolution mass spectrum of compound 8 .....                                                                                                       | 23 |
| Figure S40. Overlayed conformers and population of Boltzmann averaged conformers of compound 8 optimized at the DFT/wb97xd/6-31+g(d,p) level in the gas phase. .... | 23 |
| Figure S41. Absorbance spectra of compounds 1-8 in water. ....                                                                                                      | 24 |

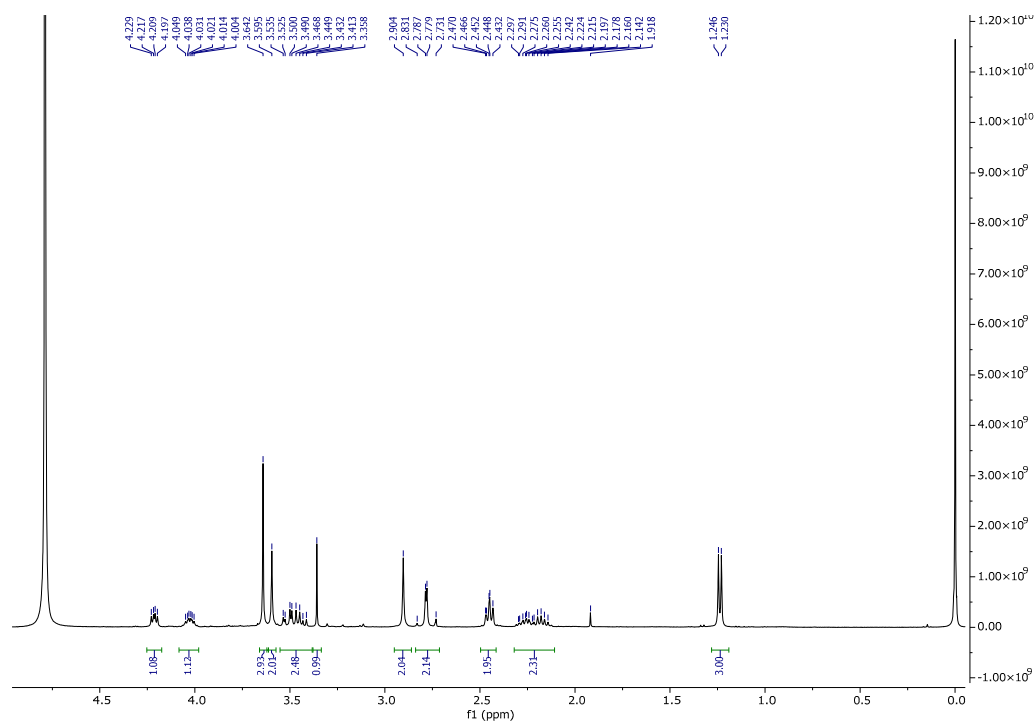

**Figure S1.**  $^1\text{H}$  NMR spectrum of compound **1** in  $\text{D}_2\text{O}$

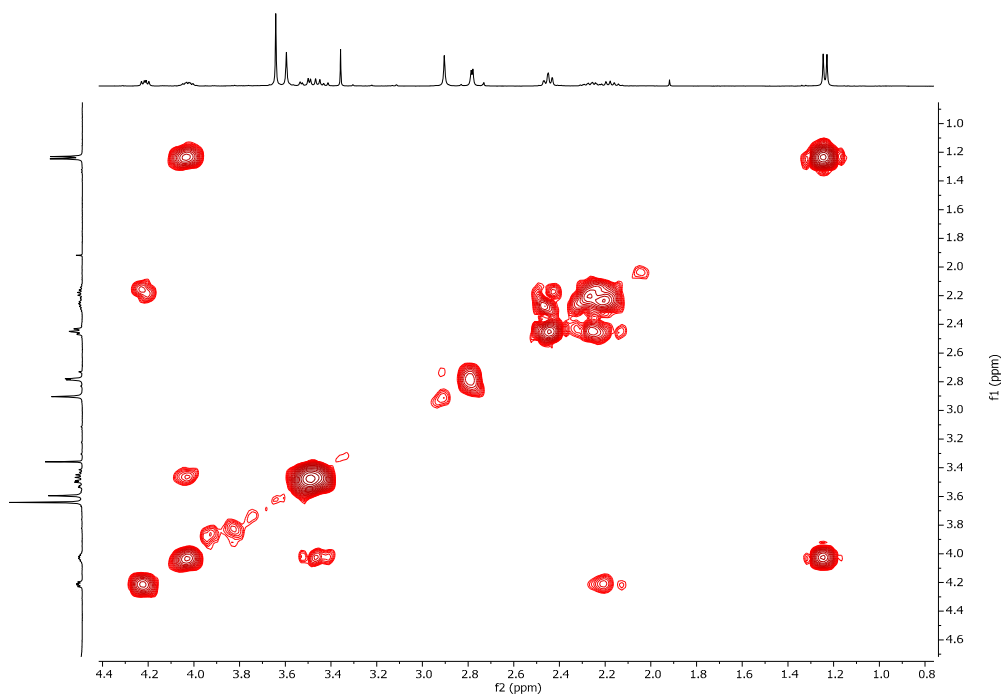

**Figure S2.** COSY spectrum of compound **1** in  $\text{D}_2\text{O}$

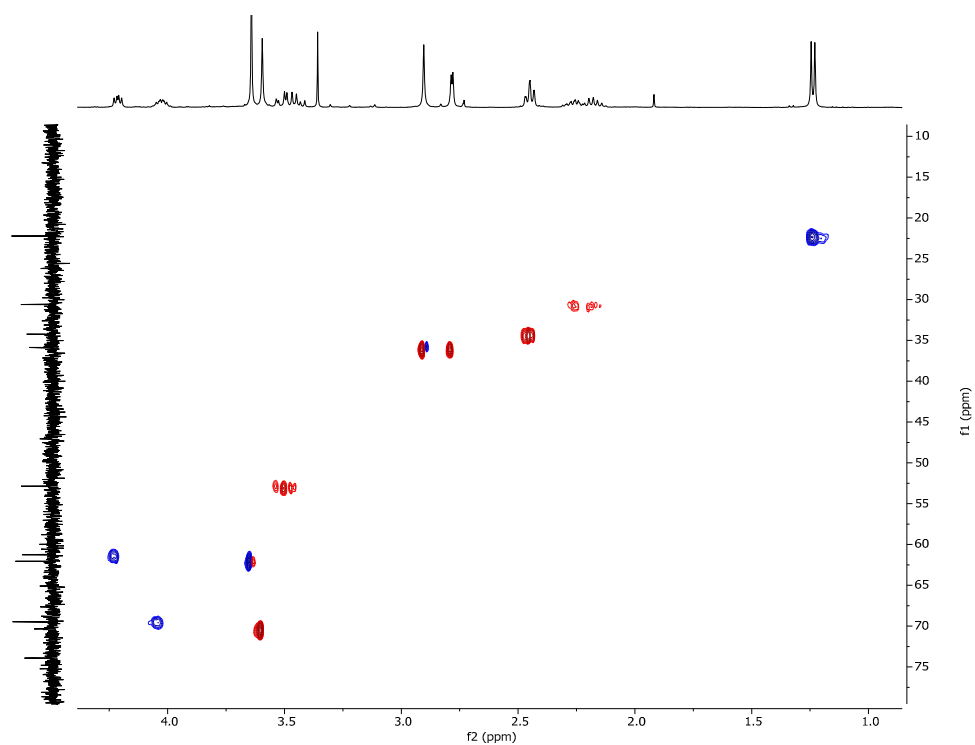

**Figure S3.** HSQC spectrum of compound **1** in D<sub>2</sub>O

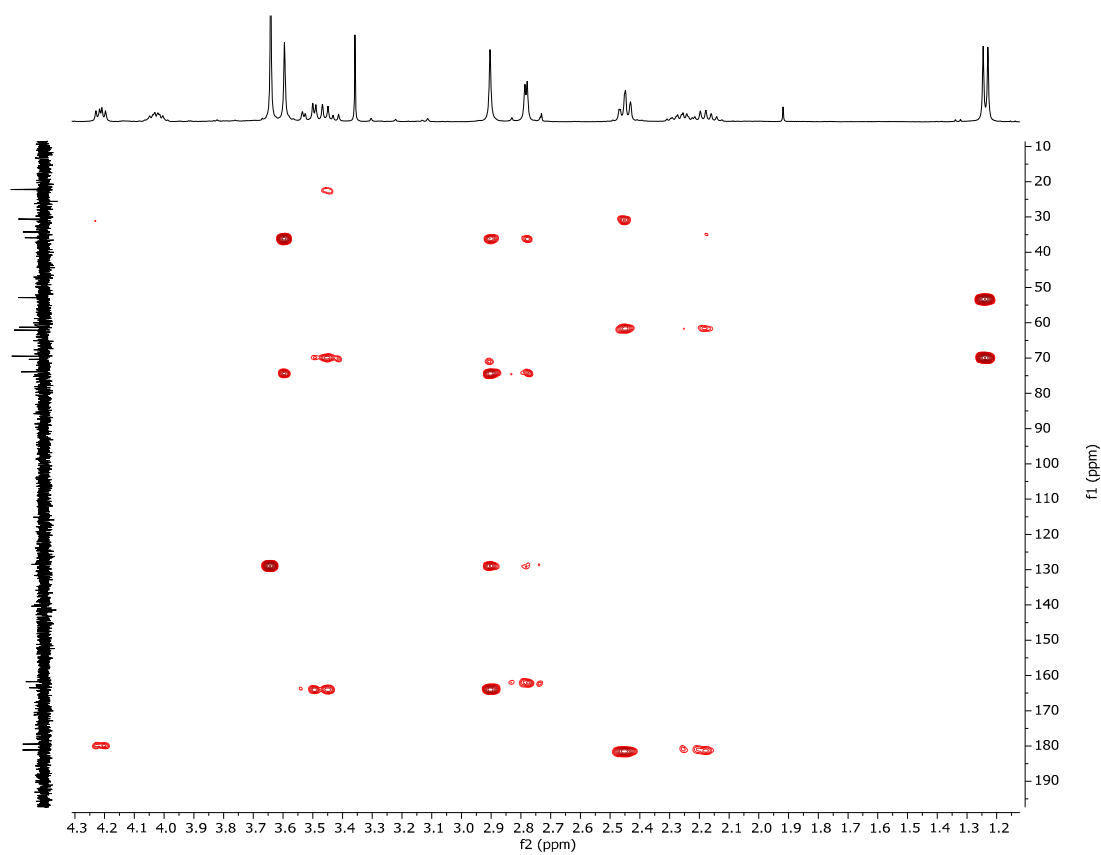

**Figure S4.** HMBC spectrum of compound **1** in D<sub>2</sub>O

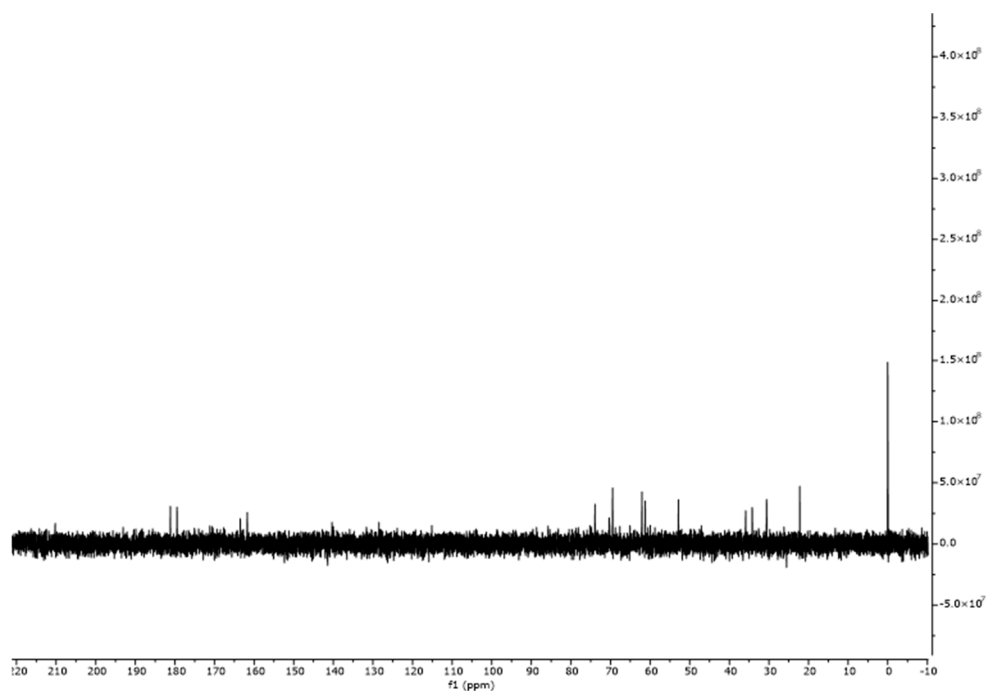

**Figure S5.**  $^{13}\text{C}$  NMR spectrum of compound **1** in  $\text{D}_2\text{O}$

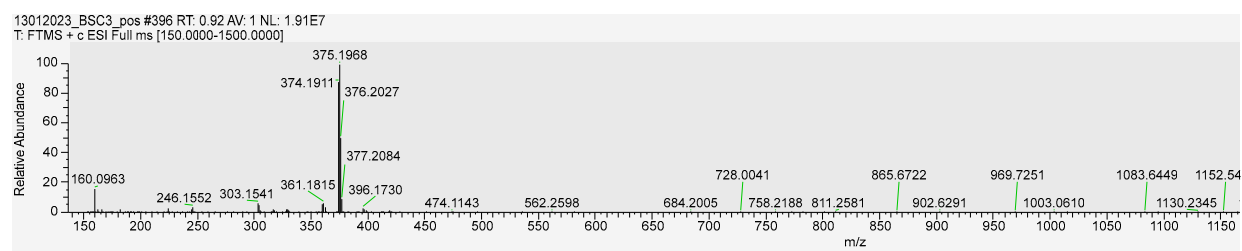

**Figure S6.** High-resolution mass spectrum of compound **1**

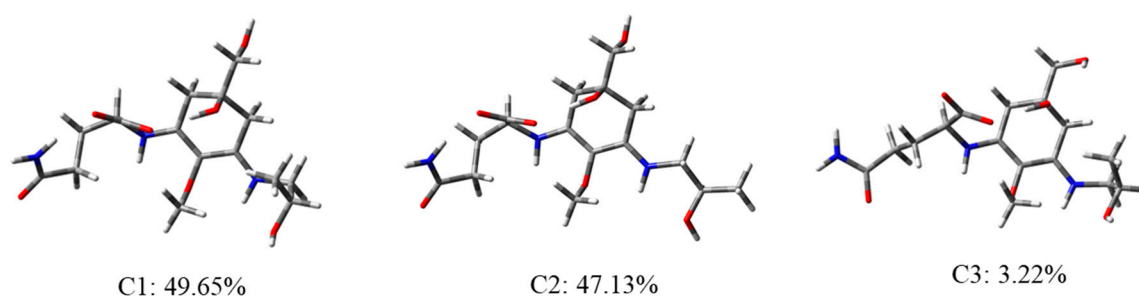

**Figure S7.** Overlayed conformers and population of Boltzmann averaged conformers of compound **1** optimized at the DFT/wb97xd/6-31+g(d,p) level in the gas phase.

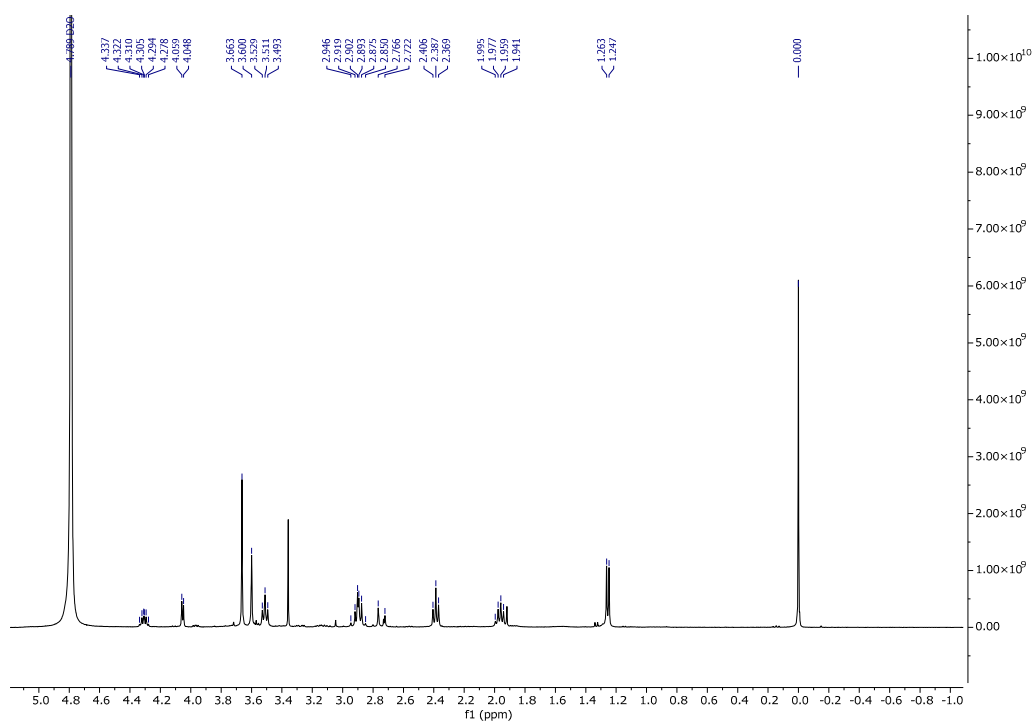

**Figure S8.** <sup>1</sup>H NMR spectrum of compound **2** in D<sub>2</sub>O

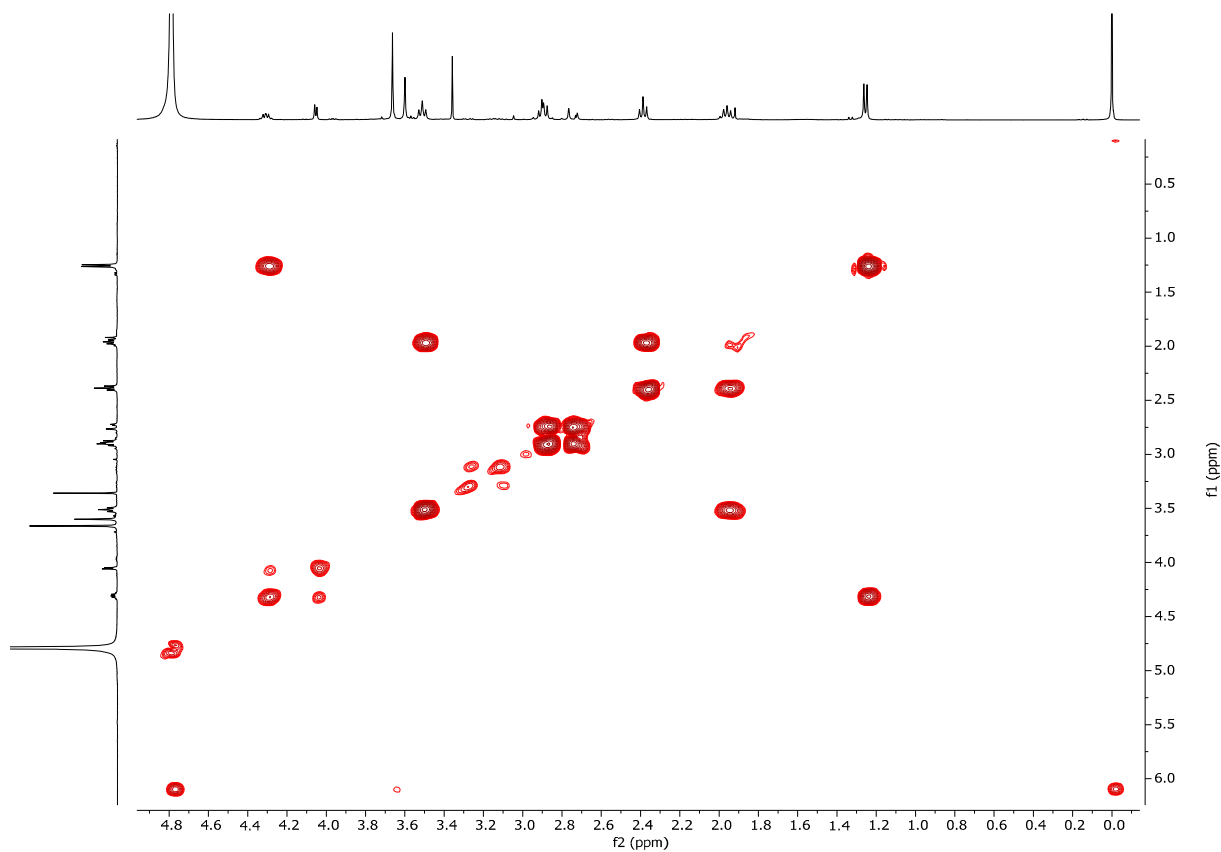

**Figure S9.** COSY spectrum of compound **2** in D<sub>2</sub>O

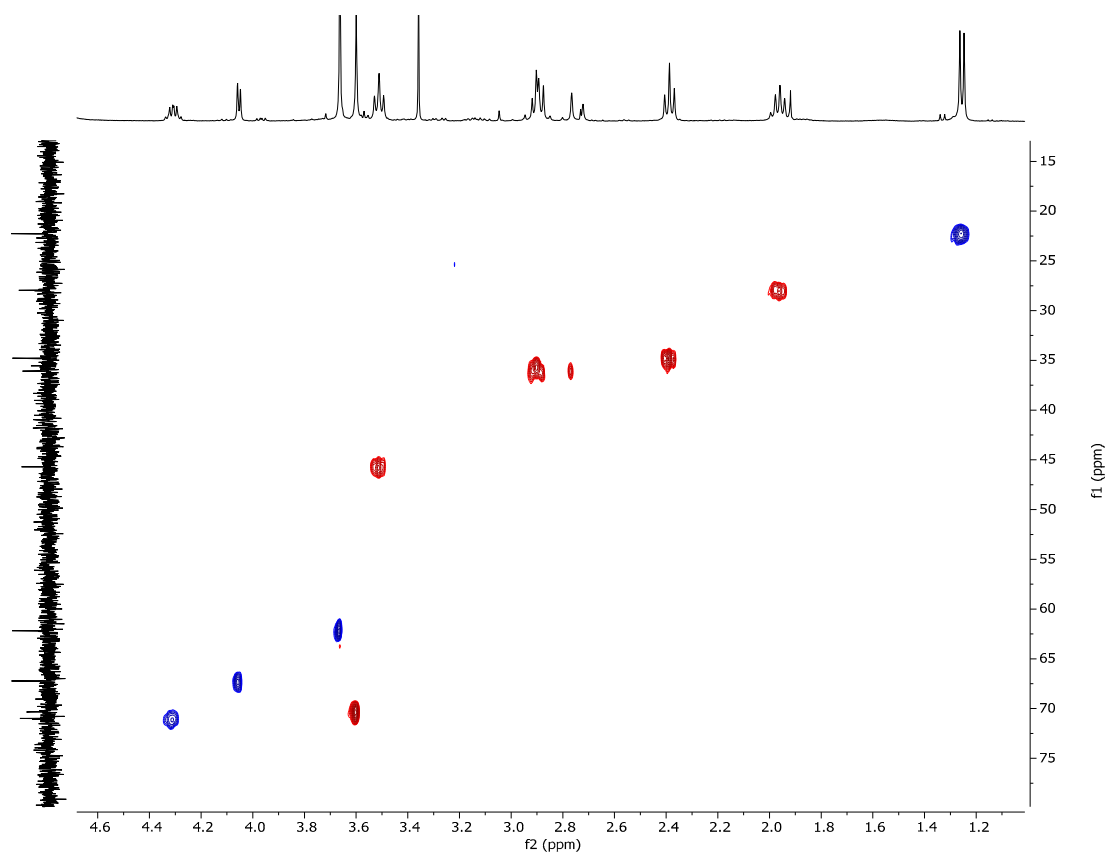

**Figure S10.** HSQC spectrum of compound **2** in D<sub>2</sub>O

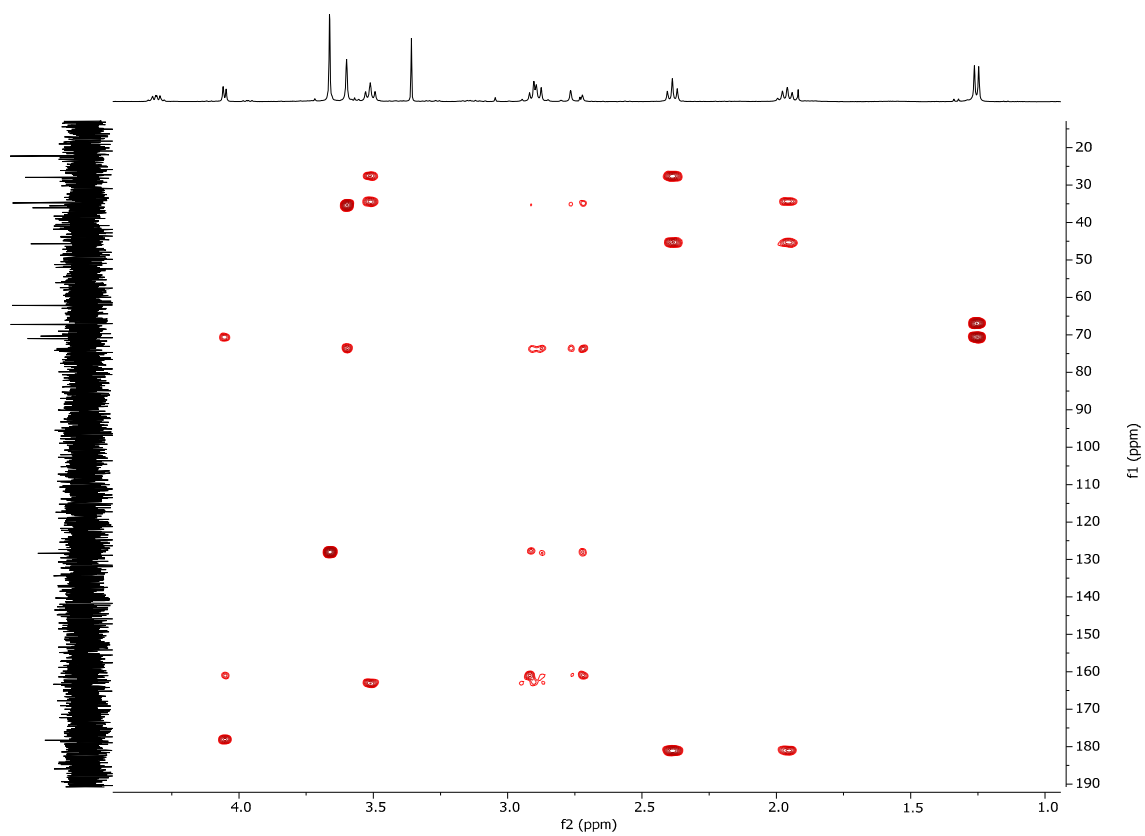

**Figure S11.** HMBC spectrum of compound **2** in D<sub>2</sub>O



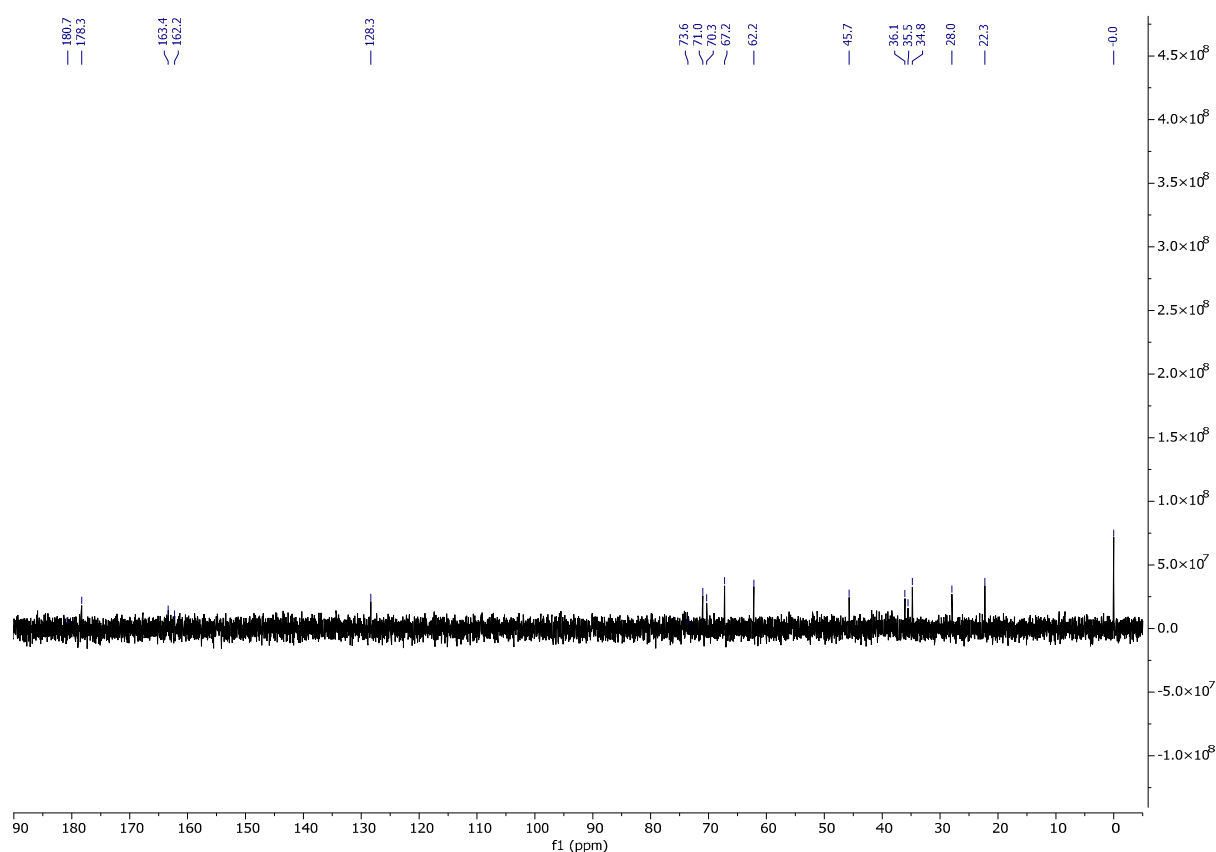

**Figure S12.** <sup>13</sup>C NMR spectrum of compound 2 in D<sub>2</sub>O

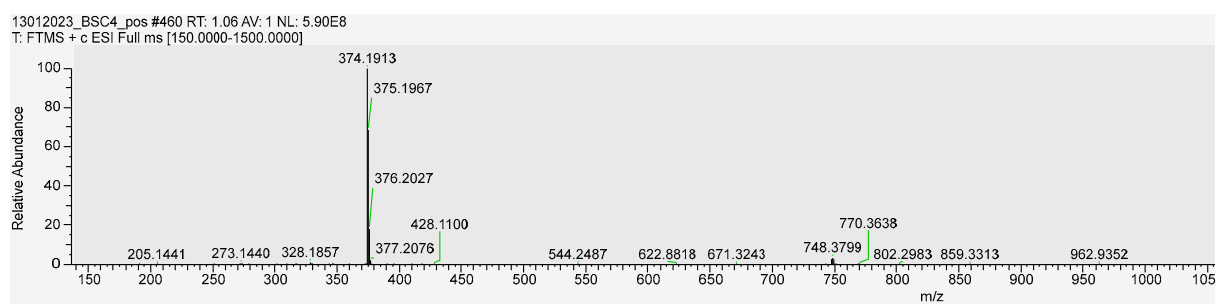

**Figure S13.** High-resolution mass spectrum of compound 2

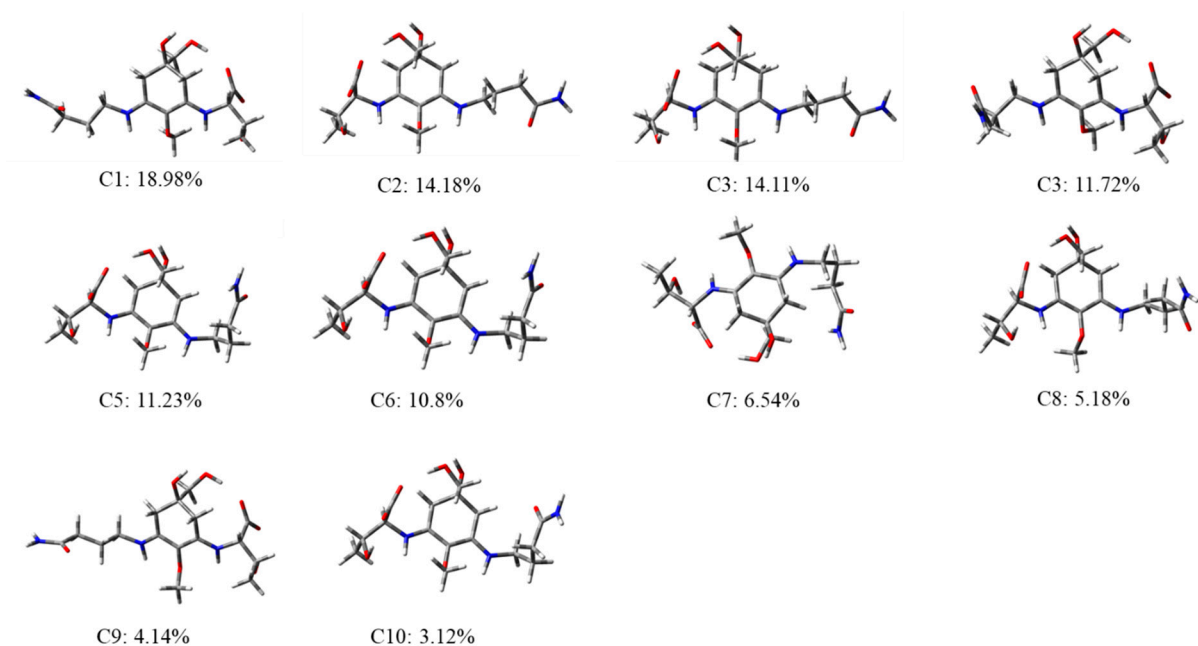

**Figure S14.** Overlayered conformers and population of Boltzmann averaged conformers of compound 2 optimized at the DFT/wb97xd/6-31+g(d,p) level in the gas phase.

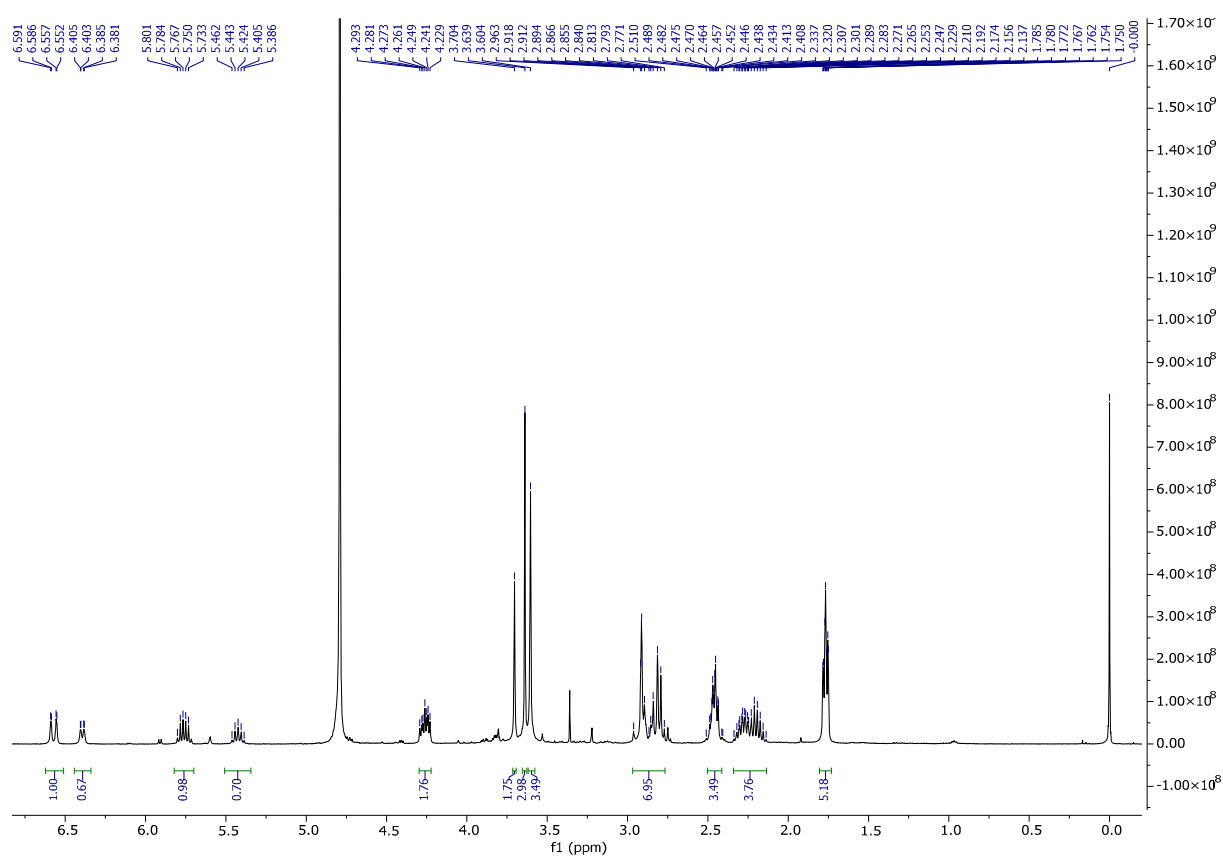

**Figure S15.**  $^1\text{H}$  NMR spectrum of compounds 3 and 4 in  $\text{D}_2\text{O}$

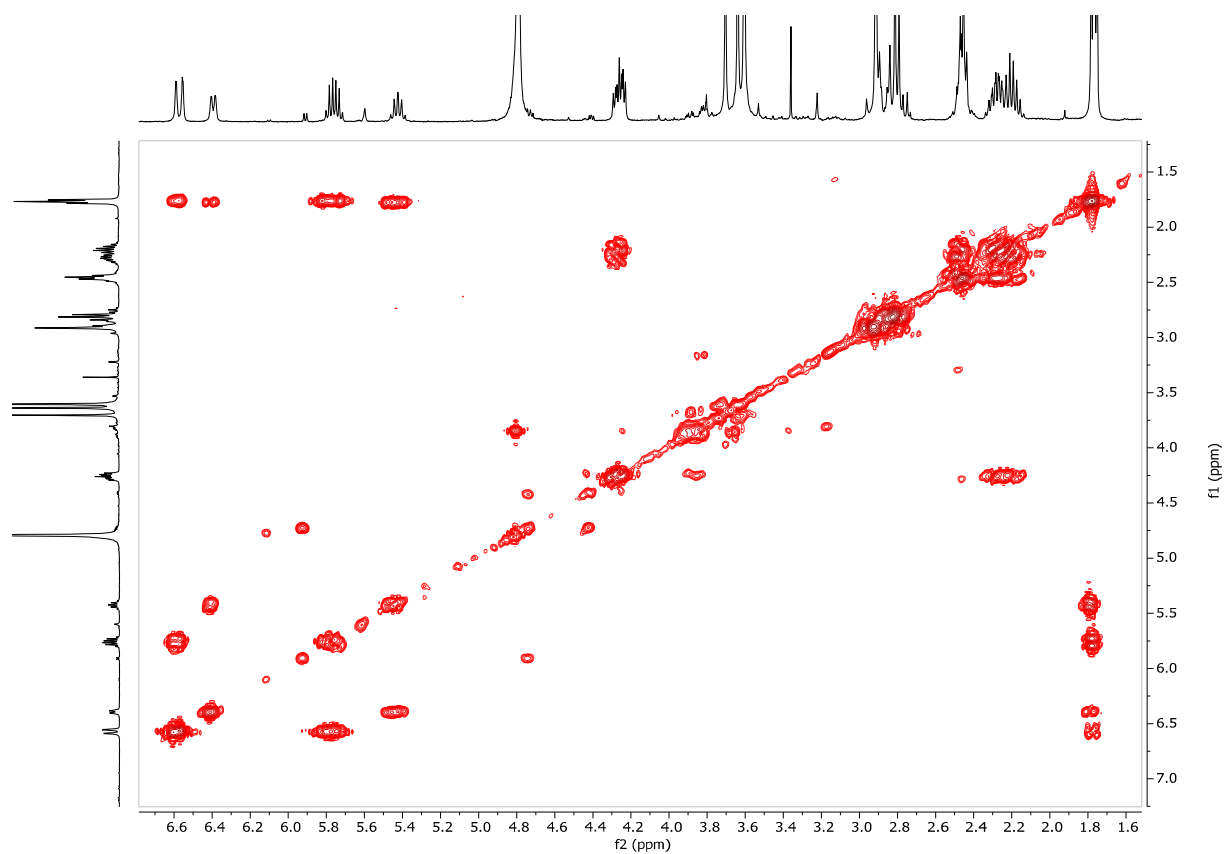

**Figure S16.** COSY spectrum of compounds **3** and **4** in D<sub>2</sub>O

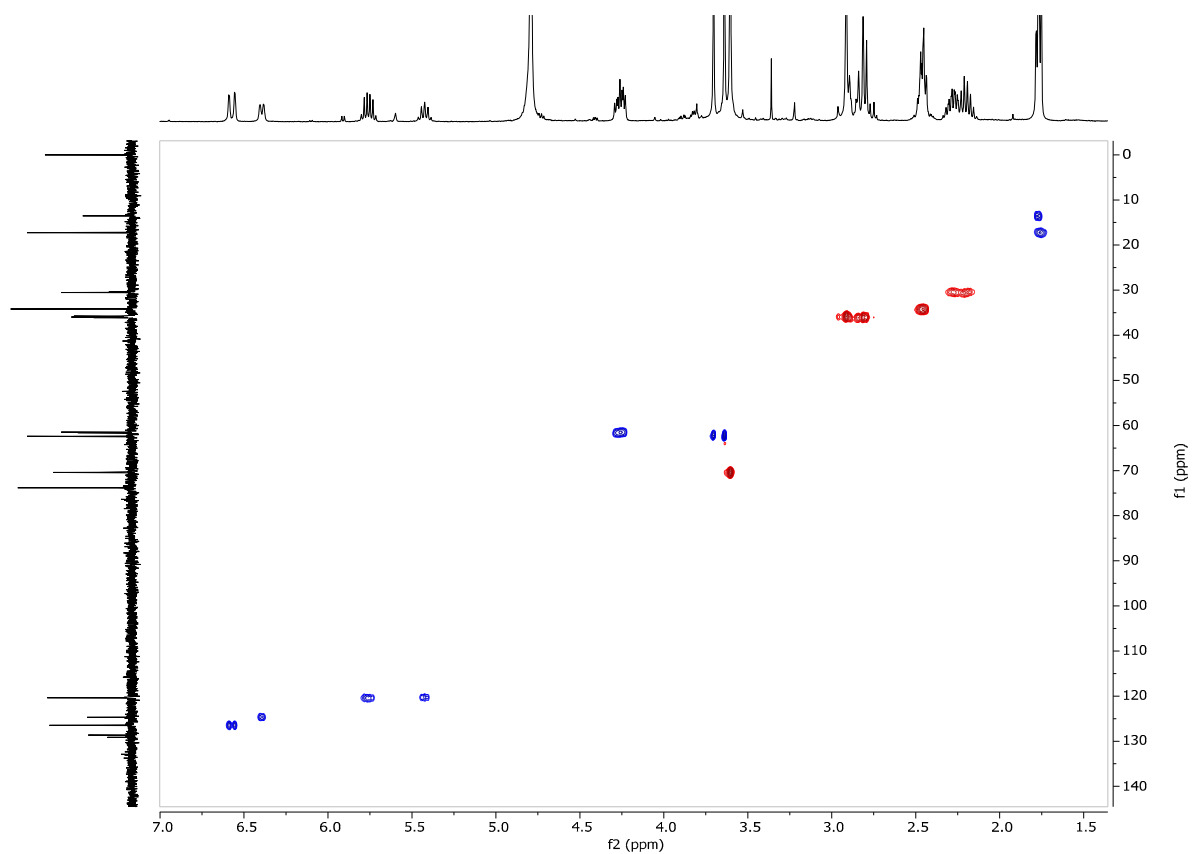

**Figure S17.** HSQC spectrum of compounds **3** and **4** in  $\text{D}_2\text{O}$

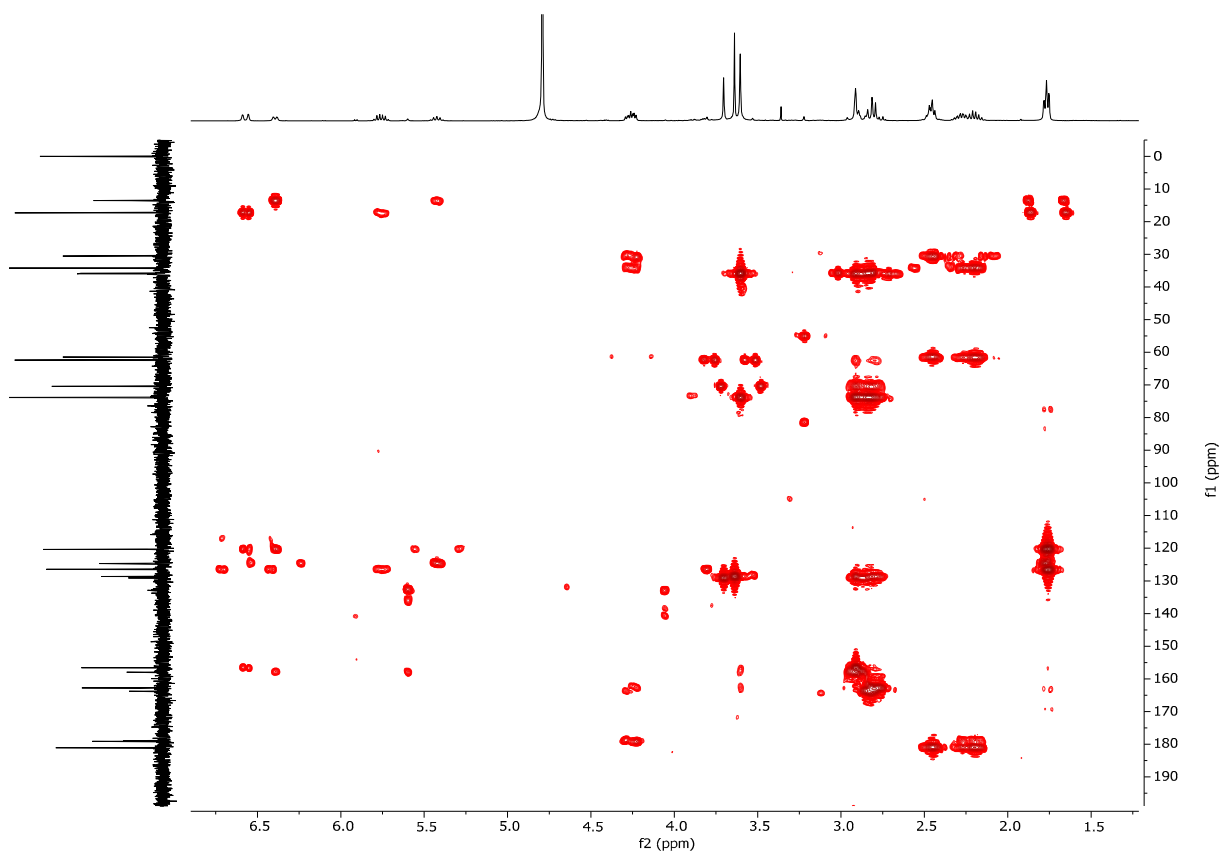

**Figure S18.** HMBC spectrum of compounds **3** and **4** in  $\text{D}_2\text{O}$

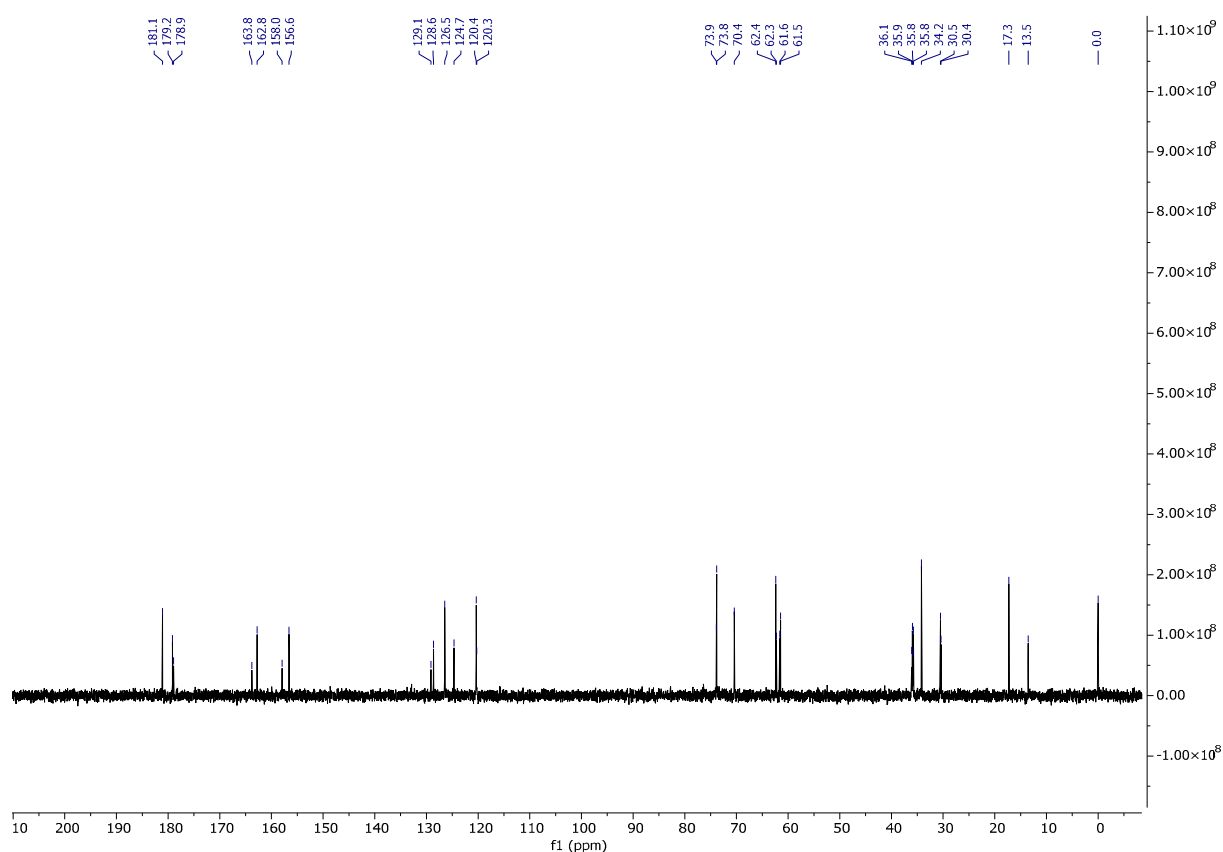

**Figure S19.** <sup>13</sup>C NMR spectrum of compounds **3** and **4** in D<sub>2</sub>O

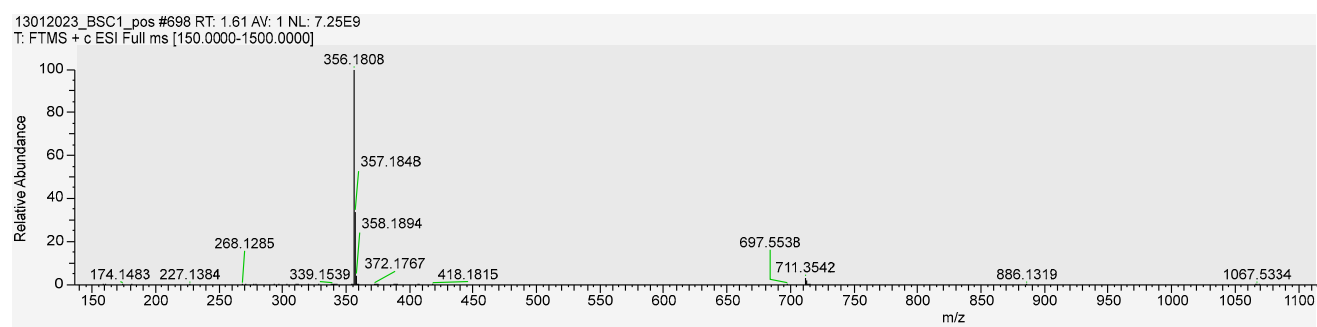

**Figure S20.** High-resolution mass spectrum of compounds **3** and **4**

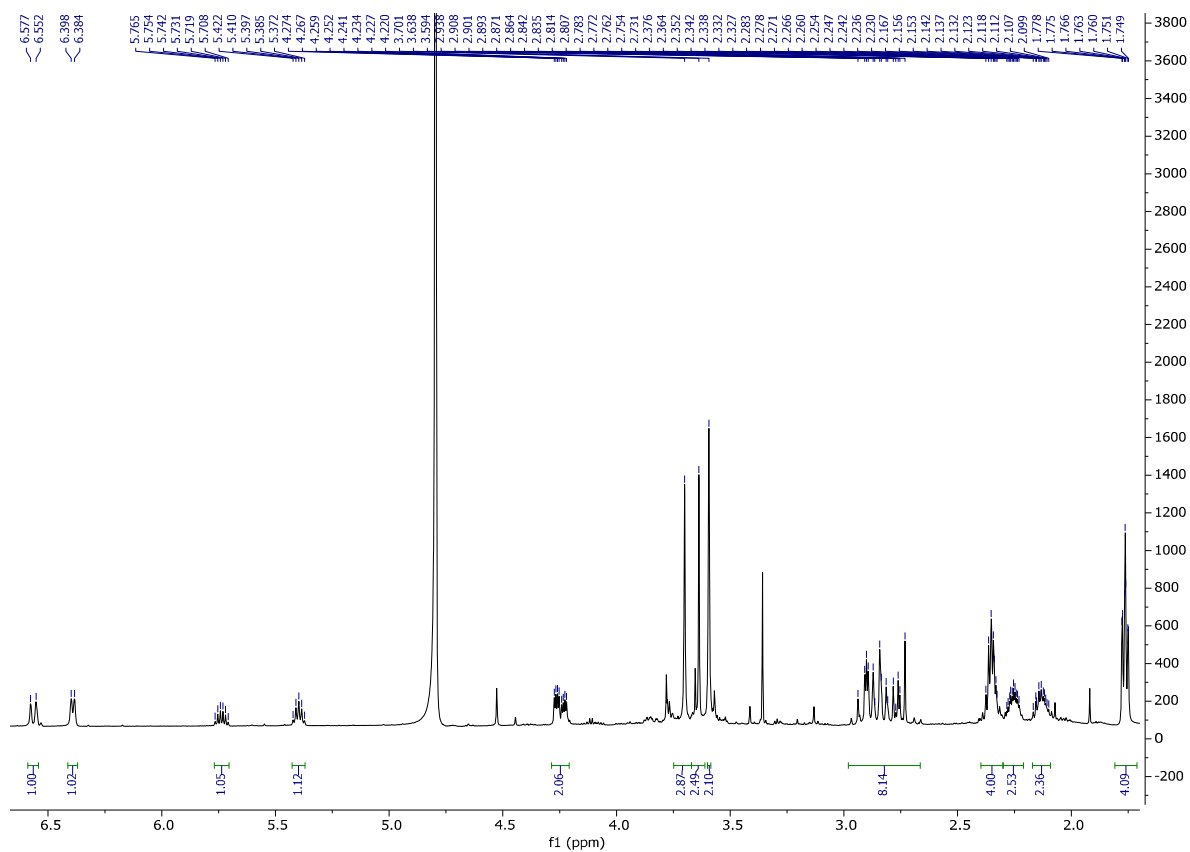

**Figure S21.**  $^1\text{H}$  NMR spectrum of compounds **5** and **6** in  $\text{D}_2\text{O}$

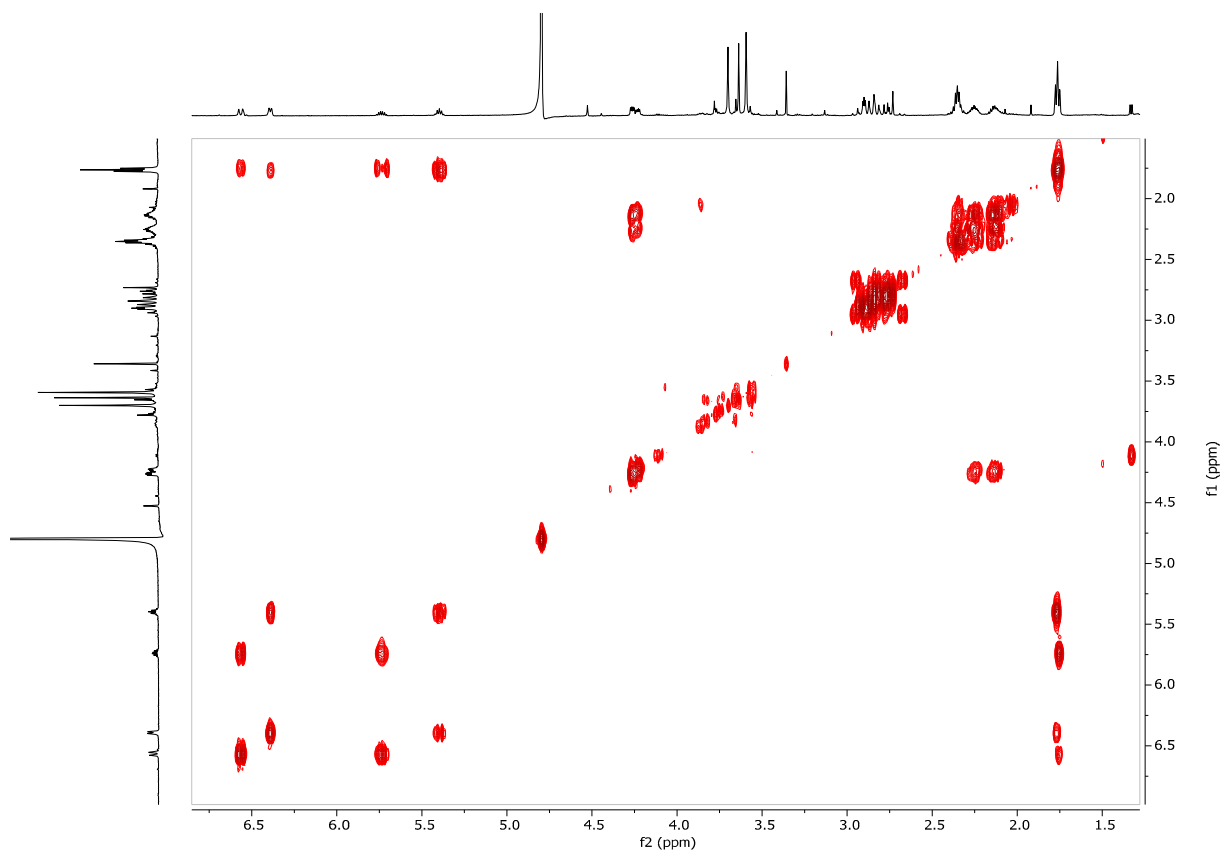

**Figure S22.** COSY spectrum of compounds **5** and **6** in  $\text{D}_2\text{O}$

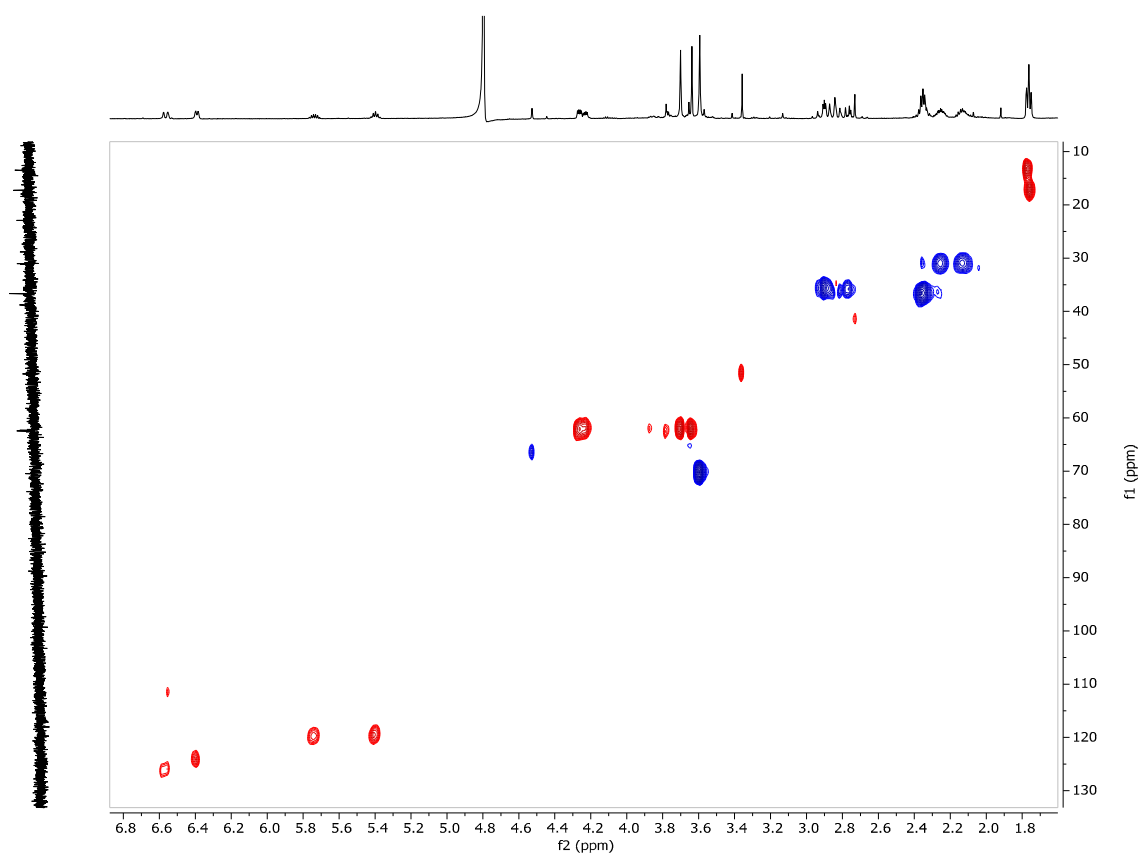

**Figure S23.** HSQC spectrum of compounds **5** and **6** in D<sub>2</sub>O

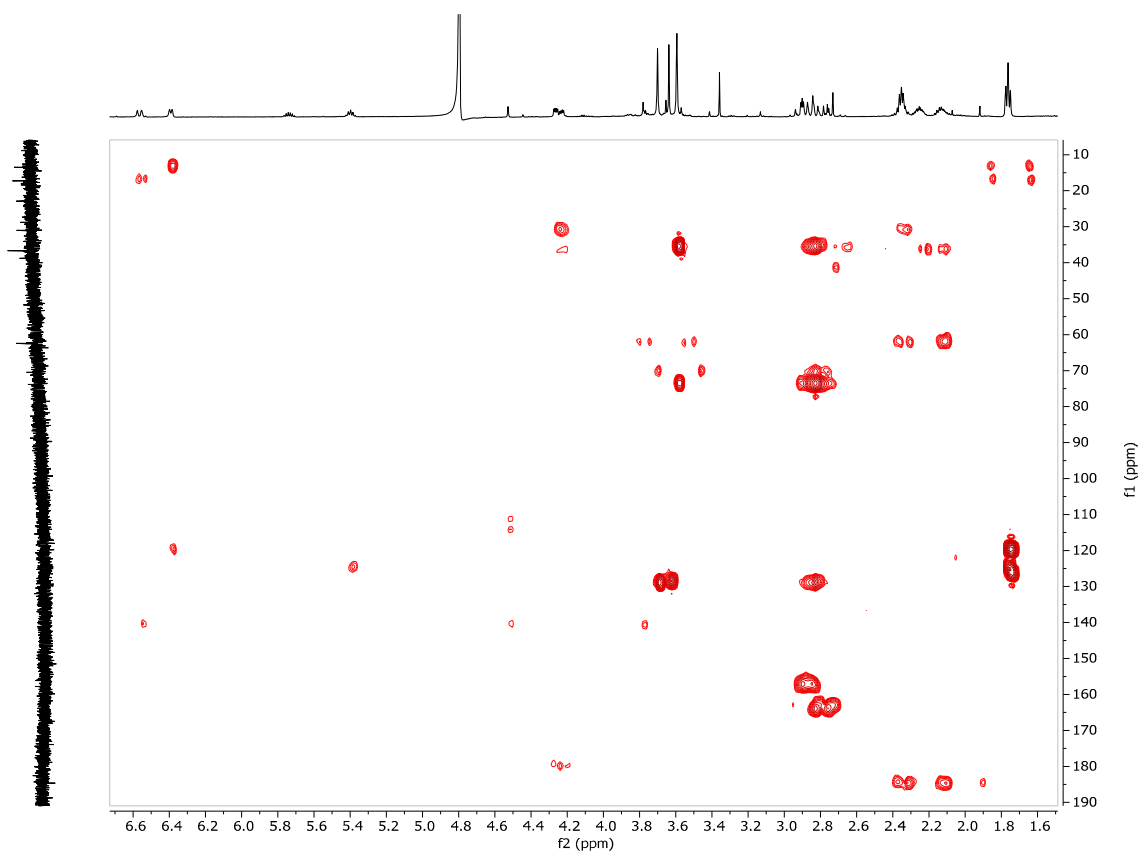

**Figure S24.** HMBC spectrum of compounds **5** and **6** in D<sub>2</sub>O

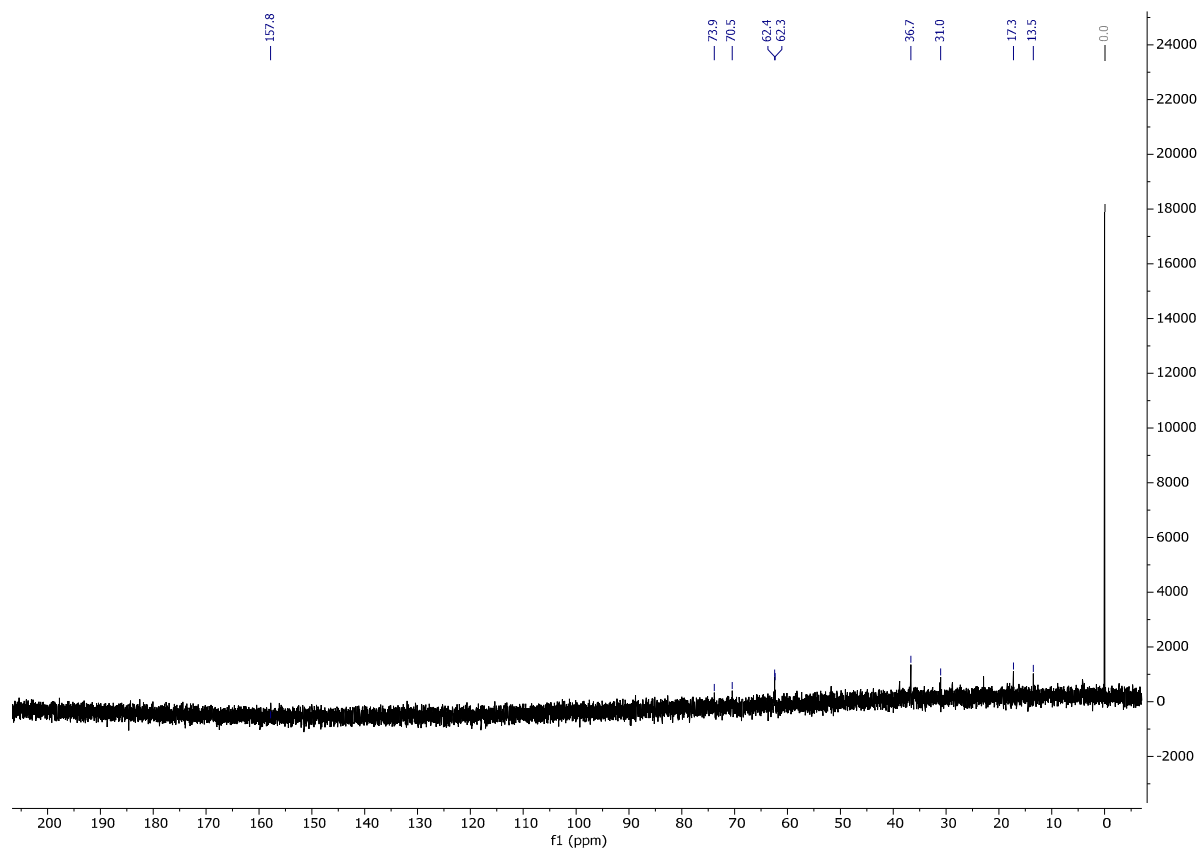

**Figure S25.** <sup>13</sup>C NMR spectrum of compounds **5** and **6** in D<sub>2</sub>O

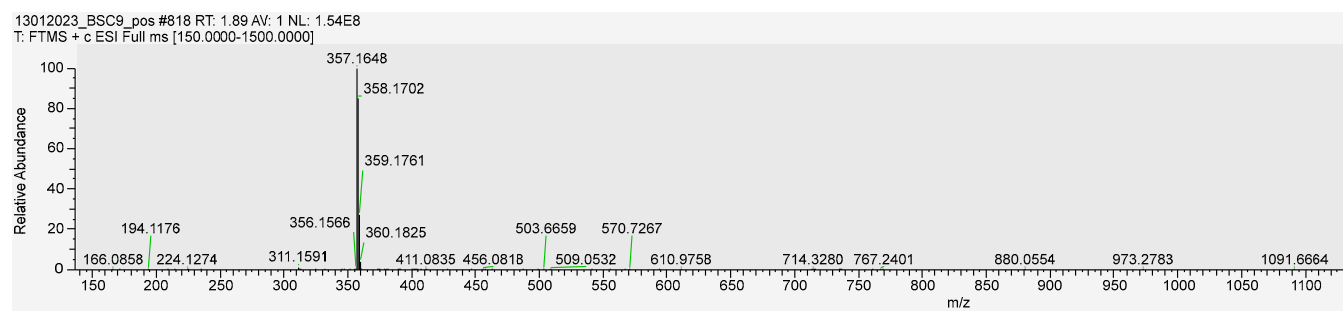

**Figure S26.** High-resolution mass spectrum of compounds **5** and **6**



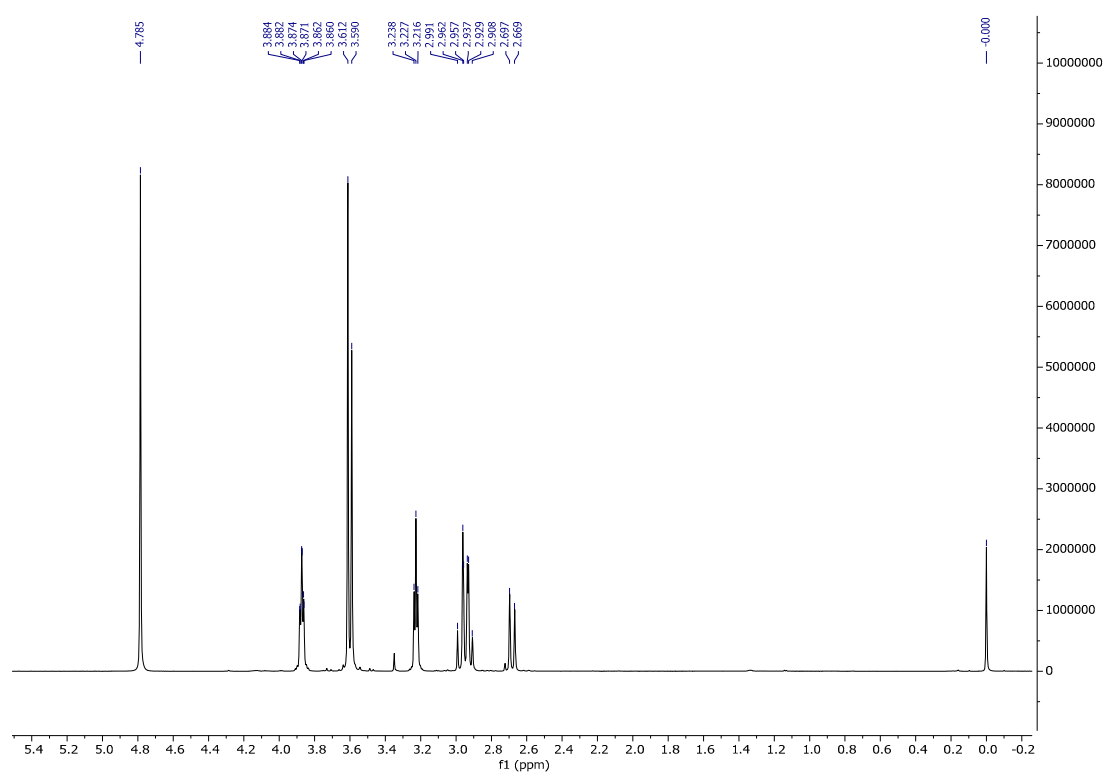

**Figure S27.** <sup>1</sup>H NMR spectrum of compound 7 in D<sub>2</sub>O

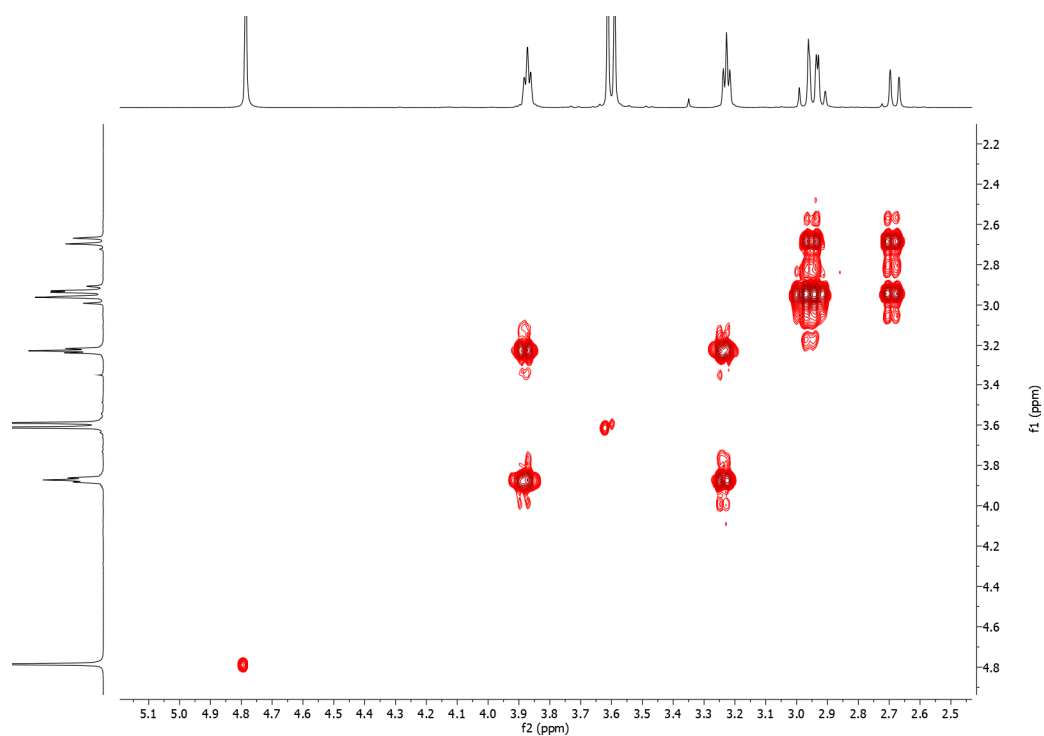

**Figure S28.** COSY spectrum of compound 7 in D<sub>2</sub>O

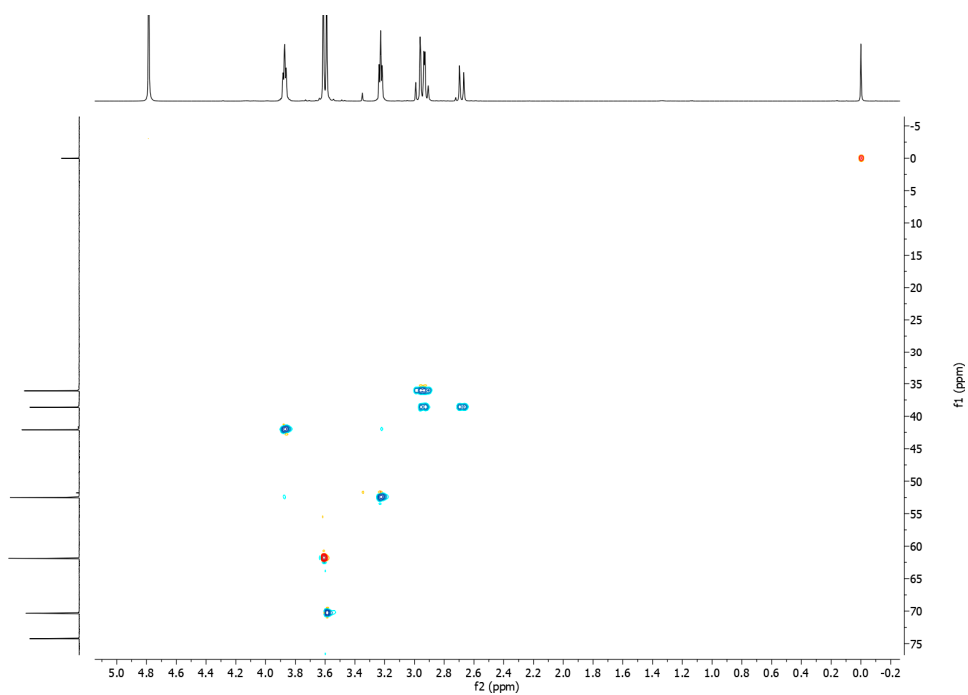

**Figure S29.** HSQC spectrum of compound **7** in D<sub>2</sub>O

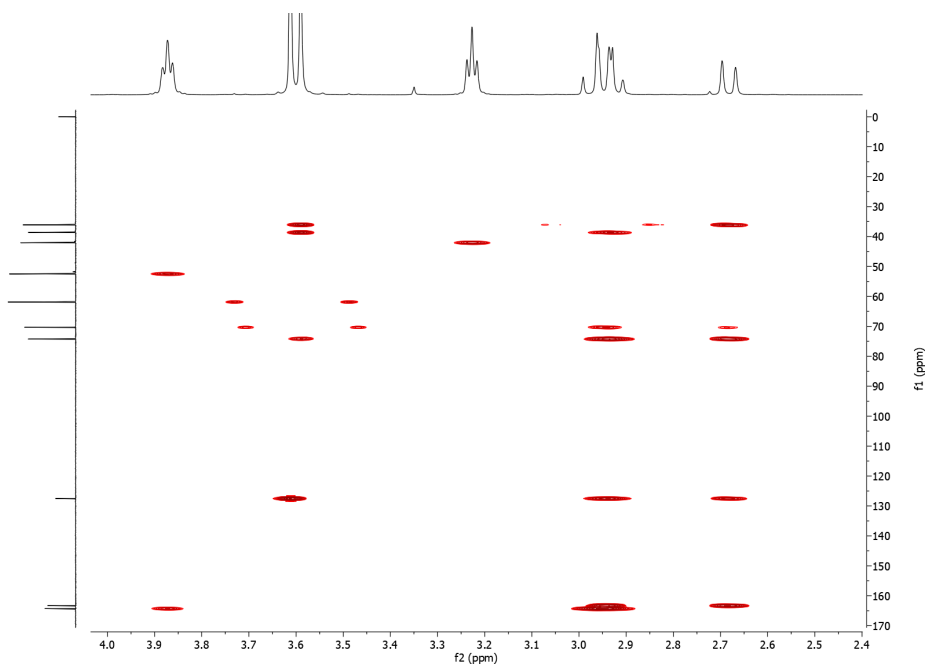

**Figure S30.** HMBC spectrum of compound **7** in D<sub>2</sub>O

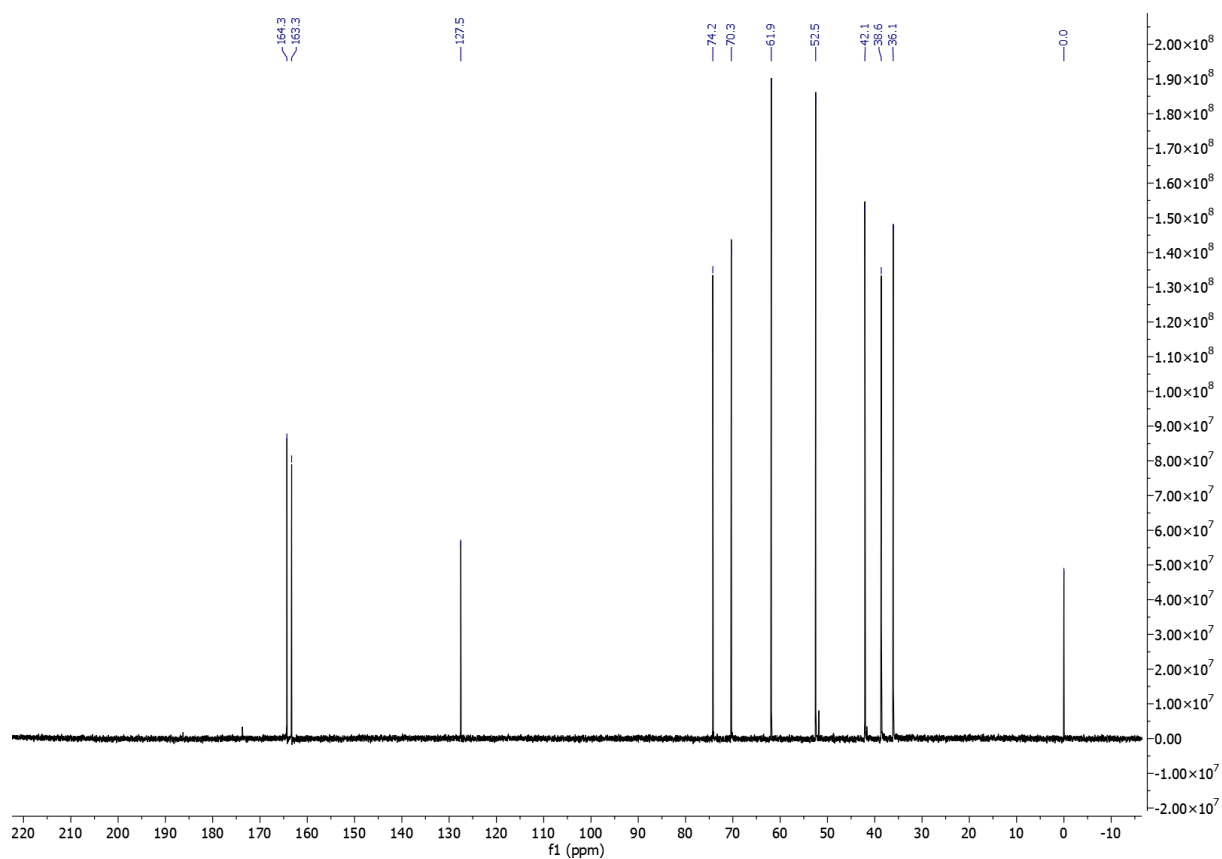

**Figure S31.** <sup>13</sup>C NMR spectrum of compound **7** in D<sub>2</sub>O

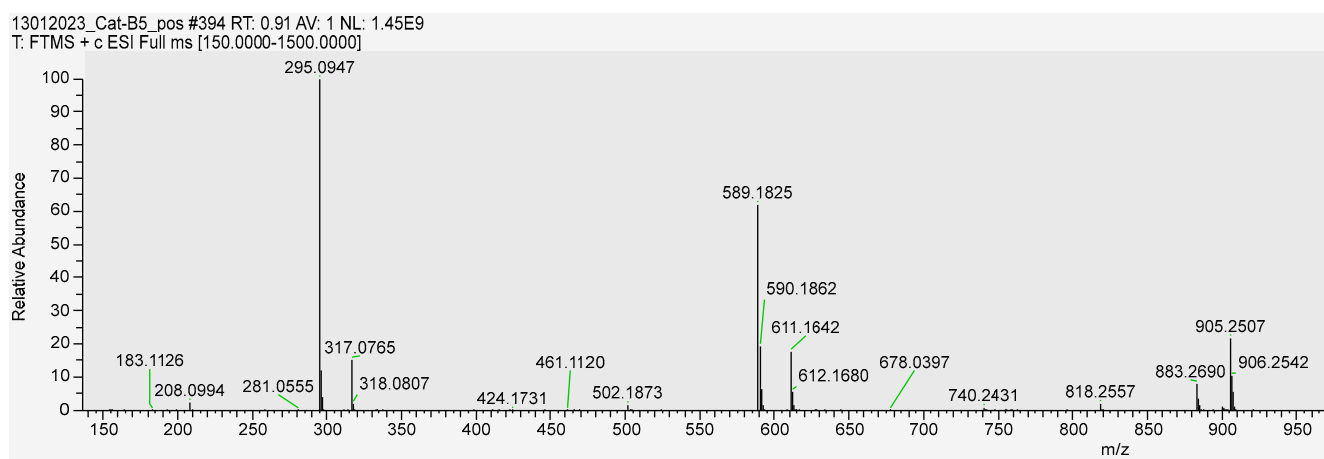

**Figure S32.** High-resolution mass spectrum of compound **7**

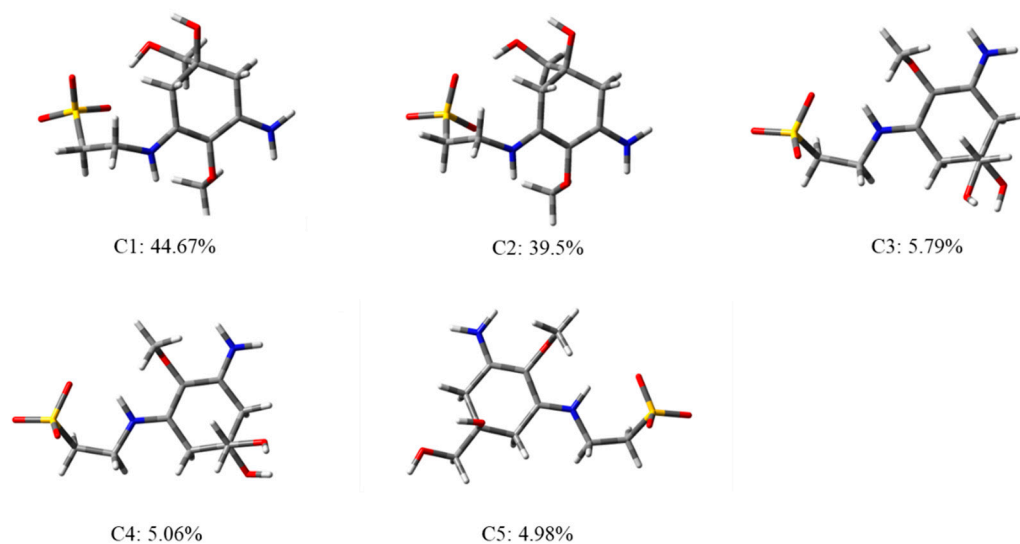

**Figure S33.** Overlayed conformers and population of Boltzmann averaged conformers of compound **7** optimized at the DFT/wb97xd/6-31+g(d,p) level in the gas phase.

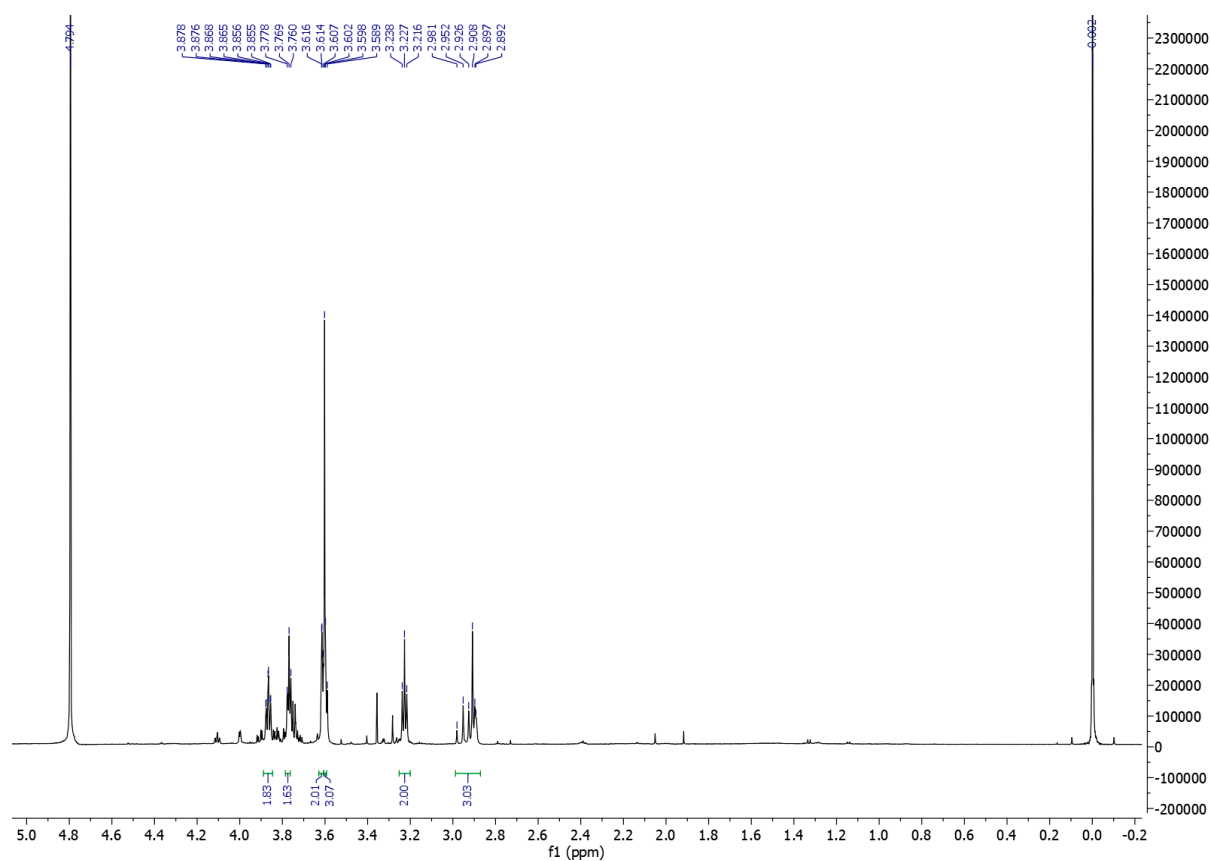

**Figure S34.**  $^1\text{H}$  NMR spectrum of compound **8** in  $\text{D}_2\text{O}$

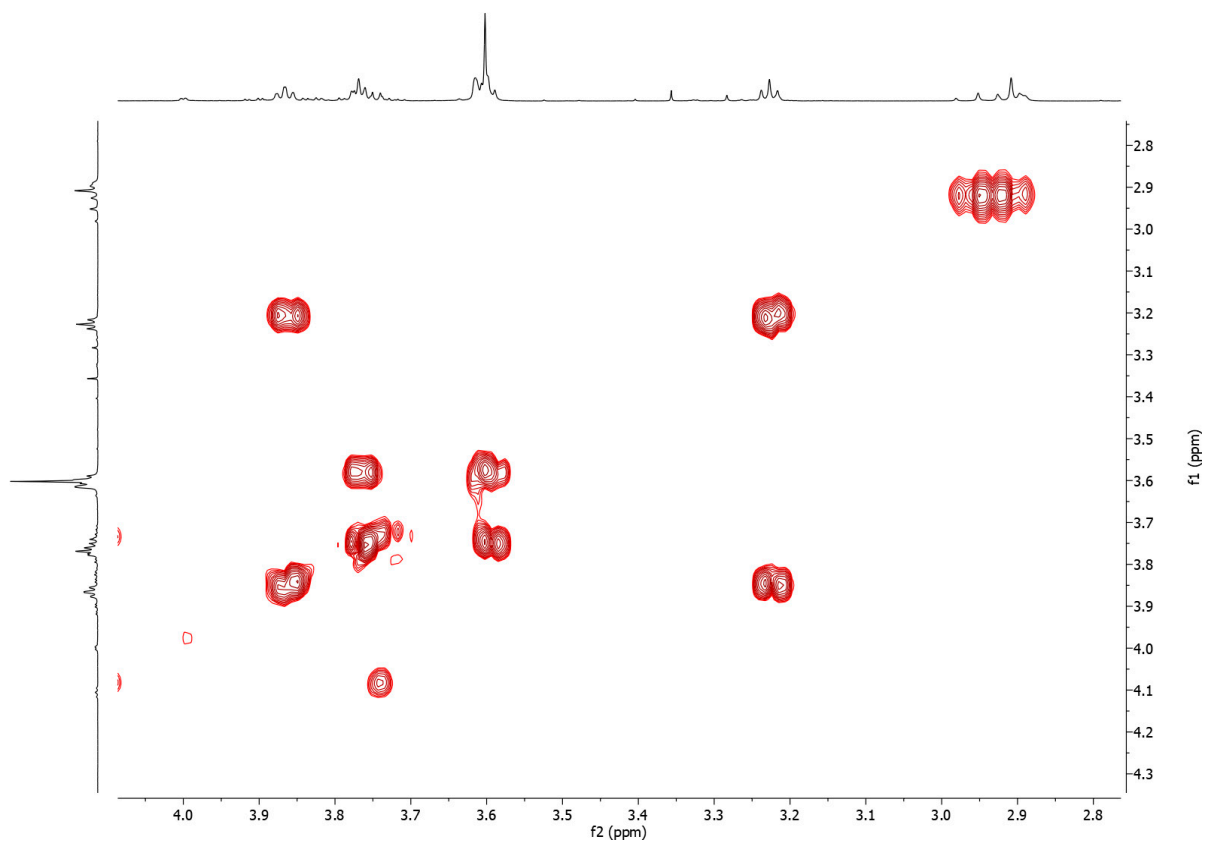

**Figure S35.** COSY spectrum of compound **8** in  $\text{D}_2\text{O}$

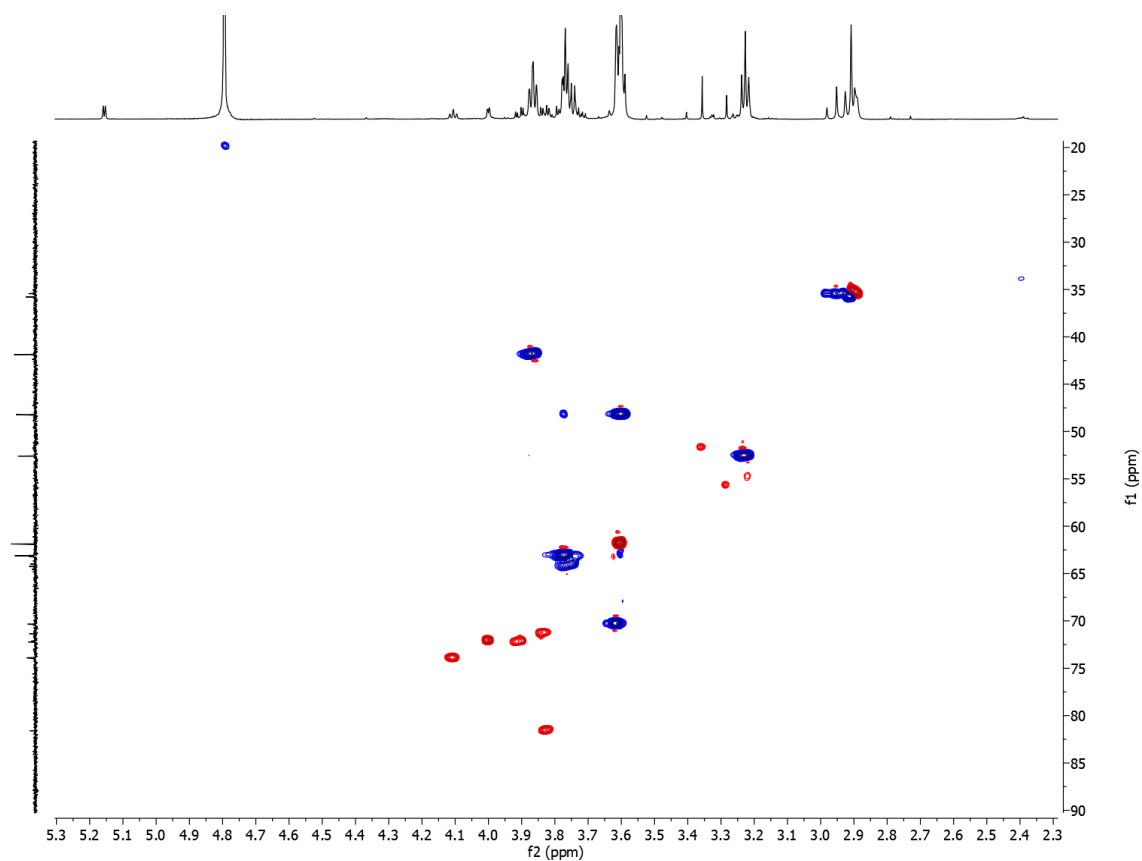

**Figure S36.** HSQC spectrum of compound **8** in D<sub>2</sub>O

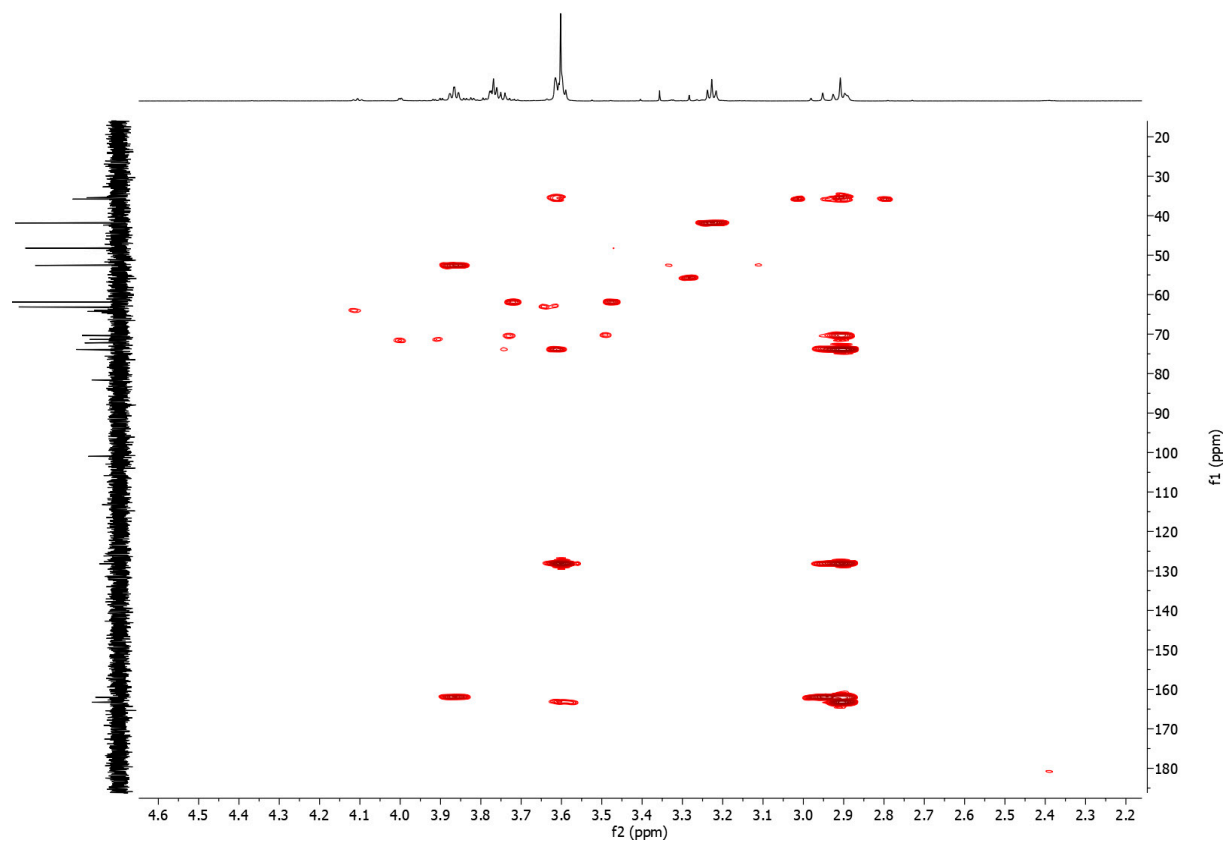

**Figure S37.** HMBC spectrum of compound **8** in D<sub>2</sub>O

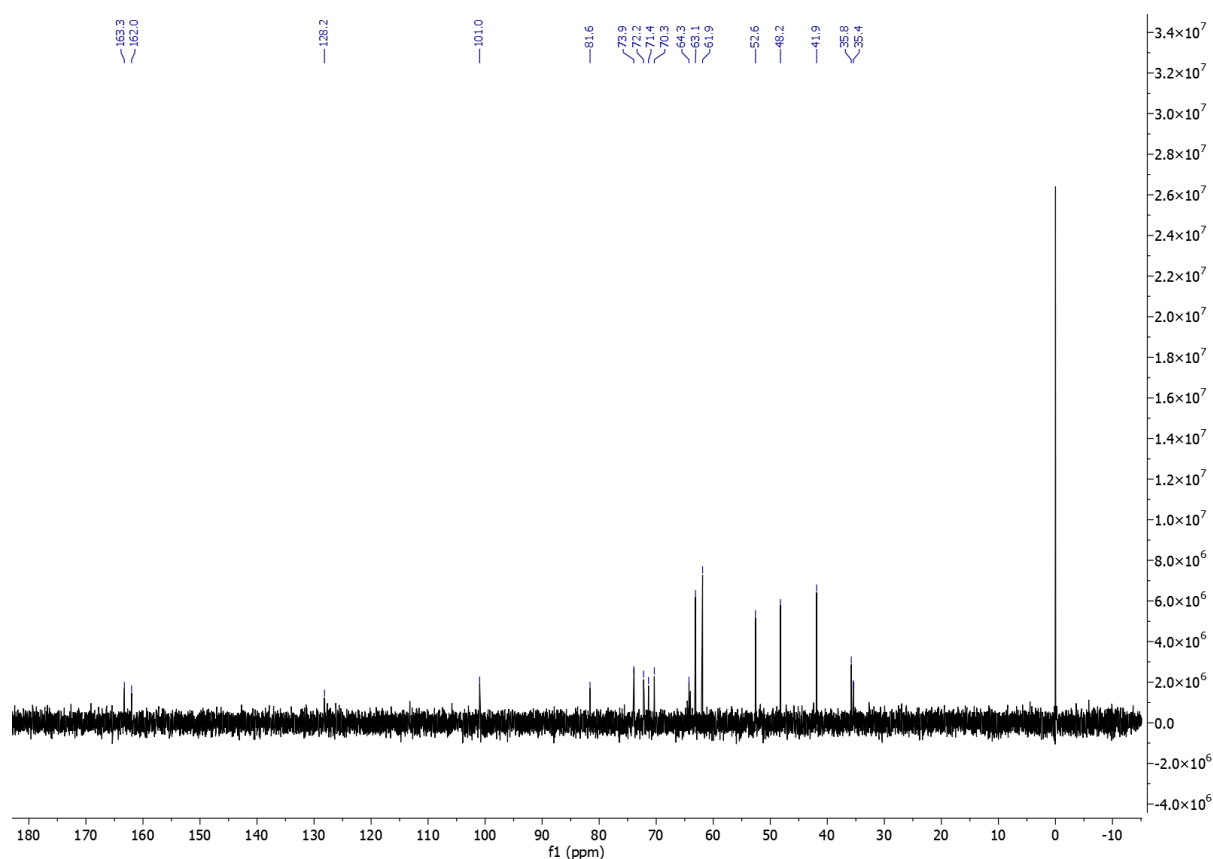

**Figure S38.**  $^{13}\text{C}$  NMR spectrum of compound **8** in  $\text{D}_2\text{O}$

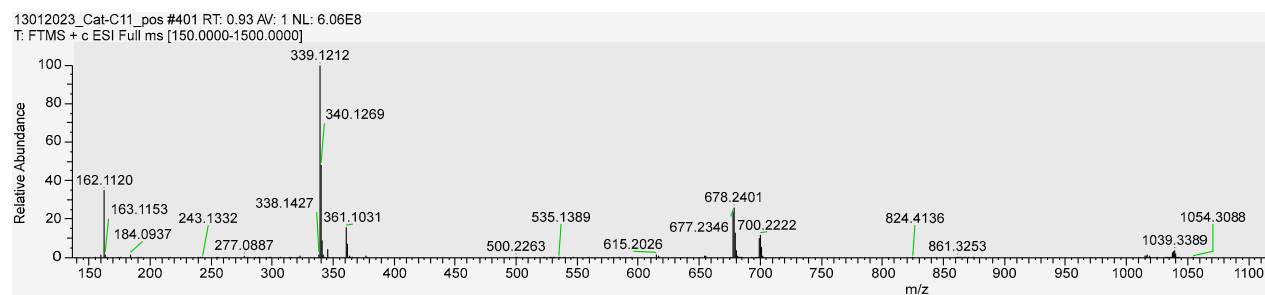

**Figure S39.** High-resolution mass spectrum of compound **8**

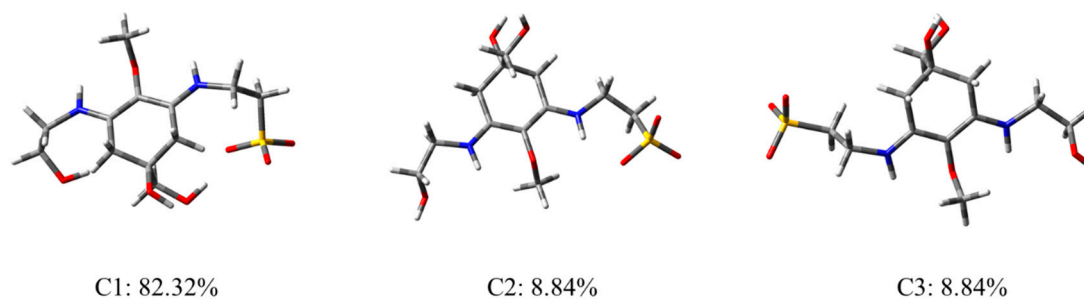

**Figure S40.** Overlayered conformers and population of Boltzmann averaged conformers of compound **8** optimized at the DFT/wb97xd/6-31+g(d,p) level in the gas phase.

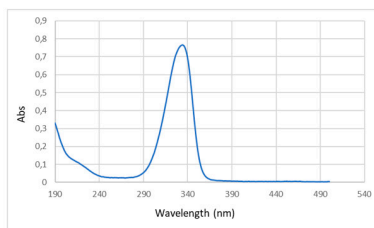

Compound 1

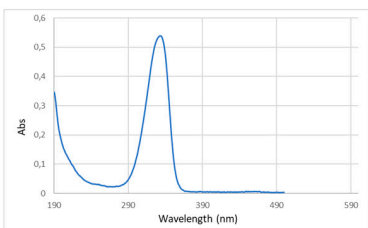

Compound 2

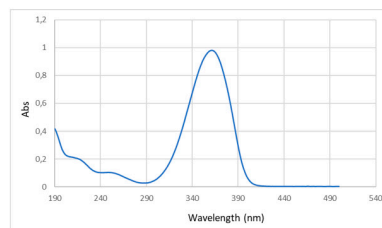

Compounds 3 and 4

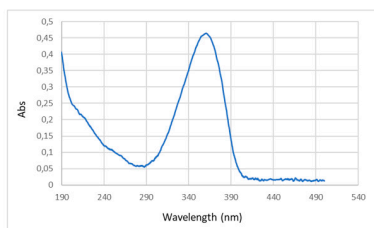

Compounds 5 and 6

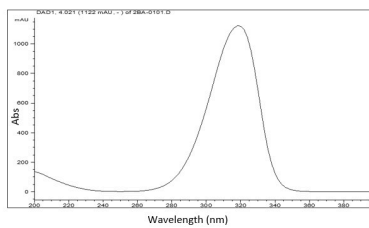

Compound 7

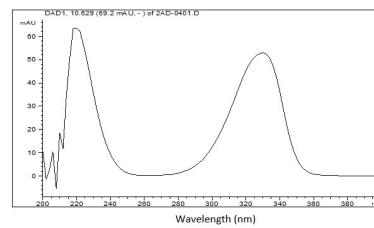

Compound 8

**Figure S41.** Absorbance spectra of compounds 1-8 in water.
